1 **Genetic structure and molecular diversity of Brazilian**  
2 **grapevine germplasm: management and use in breeding**  
3 **programs**

4

5 Geovani Luciano de Oliveira<sup>1</sup>, Anete Pereira de Souza<sup>2,3</sup>, Fernanda Ancelmo de  
6 Oliveira<sup>2</sup>, Maria Imaculada Zucchi<sup>4</sup>, Livia Moura de Souza<sup>2</sup>, Mara Fernandes Moura<sup>1\*</sup>

7

8 <sup>1</sup> Advanced Fruit Research Center, Agronomic Institute (IAC), Jundiaí, SP, Brazil

9 <sup>2</sup> Molecular Biology and Genetic Engineering Center (CBMEG), University of  
10 Campinas (UNICAMP), Campinas, SP, Brazil

11 <sup>3</sup> Department of Plant Biology, Biology Institute, University of Campinas (UNICAMP)  
12 UNICAMP, Campinas, SP, Brazil

13 <sup>4</sup> Laboratory of Conservation Genetics and Genomics, Agribusiness Technological  
14 Development of São Paulo (APTA), Piracicaba, SP, Brazil

15

16 \* Corresponding author

17 E-mail: mouram@iac.sp.gov.br (MFM)

18

## 19 **Abstract**

20 The management of germplasm banks is complex, especially when many accessions are  
21 involved. Microsatellite markers are an efficient tool for assessing the genetic diversity  
22 of germplasm collections, optimizing their use in breeding programs. This study  
23 genetically characterizes a large collection of 410 grapevine accessions maintained at  
24 the Agronomic Institute of Campinas (IAC) (Brazil). The accessions were genotyped  
25 with 17 highly polymorphic microsatellite markers. Genetic data were analyzed to  
26 determine the genetic structure of the germplasm, quantify its allelic diversity, suggest  
27 the composition of a core collection, and discover cases of synonymy, duplication, and  
28 misnaming. A total of 304 alleles were obtained, and 334 unique genotypes were  
29 identified. The molecular profiles of 145 accessions were confirmed according to the  
30 literature and databases, and the molecular profiles of more than 100 genotypes were  
31 reported for the first time. The analysis of the genetic structure revealed different levels  
32 of stratification. The primary division was between accessions related to *Vitis vinifera*  
33 and *V. labrusca*, followed by their separation from wild grapevine. A core collection of  
34 120 genotypes captured 100% of all detected alleles. The accessions selected for the  
35 core collection may be used in future phenotyping efforts, in genome association  
36 studies, and for conservation purposes. Genetic divergence among accessions has  
37 practical applications in grape breeding programs, as the choice of relatively divergent  
38 parents will maximize the frequency of progeny with superior characteristics. Together,  
39 our results can enhance the management of grapevine germplasm and guide the efficient  
40 exploitation of genetic diversity to facilitate the development of new grape cultivars for  
41 fresh fruits, wine, and rootstock.

42

## 43 **Introduction**

44 Grapevine (*Vitis* spp.) is considered to be a major fruit crop globally based on  
45 hectares cultivated and economic value [1]. Grapevines are exotic species in Brazil but  
46 have become increasingly important in national fruit agriculture in recent years,  
47 transitioning from exclusive cultivation in temperate zones to a great alternative in  
48 tropical regions.

49 European grapevine, or *V. vinifera*, cultivars stand out in terms of their economic  
50 importance, being the most commonly planted worldwide and characterized by having  
51 fruits of excellent quality with wide morphological and genetic diversity. They are  
52 widely used for the production of fresh fruits, dried fruits, and juice and in the global  
53 fine and sparkling wine industry [2].

54 In Brazil, the American *V. labrusca* varieties and hybrids (*V. labrusca* x *V.*  
55 *vinifera*) thrive because of their vegetative characteristics, which are best adapted to the  
56 country's environmental conditions, with generally high humidity. In addition, due to  
57 their relatively high robustness, they are resistant to many diseases that affect grapevine  
58 in the country, resulting in production of relatively high volume, although of low  
59 quality, and have become dominant on Brazilian plantations [3,4].

60 The wild species of the genus *Vitis* have contributed evolutionarily through  
61 interspecific crossings, accidental or planned, to the adaptation of grapevine to the  
62 highly different conditions that its expansion has demanded. Hybrid varieties are  
63 characterized by greater resistance to pests and diseases than *V. vinifera* and by  
64 producing fruits with better organoleptic characteristics than American grapes. Crosses  
65 and natural mutations have greatly benefited from the possibility of vegetative  
66 propagation among grapevines, enabling the exploitation of different characteristics

67 over time, with noticeable variations in berries, flowers, and leaves, further increasing  
68 the number of cultivars planted [2,5].

69 The starting point of any breeding program of a species is genetic variability,  
70 whether spontaneous or created. The manipulation of this variability with suitable  
71 methods leads to the safe obtainment of superior genotypes in relation to agronomic  
72 characteristics of interest [6]. Germplasm banks have a fundamental role in preserving  
73 this genetic variability but require the maintenance of accessions [7]. The quantification  
74 of the magnitude of genetic variability and its distribution between and within the  
75 groups of accessions that constitute germplasm banks is essential to promote its rational  
76 use and adequate management [8].

77 Most germplasm is derived from seeds, but for highly heterozygous plants, such  
78 as grapevines, this method is not suitable, with conservation most commonly occurring  
79 through the use of *ex situ* field collections. The germplasm banks involved in breeding  
80 programs are fundamental to the development of new materials. These collections  
81 generally have a large number of accessions, but only a small proportion of these  
82 resources are used in practice. The management of such collections becomes complex  
83 when many accessions are involved. Redundancy should be reduced to a minimum, the  
84 use of “true-to-type” plant material must be ensured, and the introduction of new  
85 accessions should be optimized [9]. Therefore, it is essential to identify and correct  
86 errors related to synonyms, homonyms, and mislabeling that can occur during the  
87 introduction and propagation of plant material [10,11]. The genetic characterization of  
88 available genetic resources may permit the optimization of the use of these resources by  
89 grouping a sufficient number of accessions in a core collection to maximize the genetic  
90 diversity described in the whole collection [12].

91 Information on the genetic diversity available in germplasm banks is valuable  
92 for use in breeding programs because such information assists in the detection of  
93 combinations of accessions capable of producing progenies with maximum variability  
94 in characteristics of interest, guiding hybridization schemes [13].

95 The identification of grapevine cultivars has traditionally been based on  
96 ampelography, which is the analysis and comparison of the morphological  
97 characteristics of leaves, branches, shoots, bunches, and berries [14], but as this process  
98 is carried out on adult plants, a long period is necessary before accession identification  
99 can be completed. Since many synonyms or homonyms exist for cultivars [2], passport  
100 data are not always sufficient to certify identities, mainly in terms of the distinction of  
101 closely related cultivars, and errors can arise. Thus, the use of molecular markers has  
102 become an effective strategy for this purpose due to the high information content  
103 detected directly at the DNA level without environmental influence and in the early  
104 stages of plant development, allowing for faster and more accurate cultivar  
105 identification [15].

106 Microsatellites, or simple sequence repeats (SSRs), are among the most  
107 appropriate and efficient markers for genetic structure and conservation studies [16].  
108 SSRs are highly polymorphic and transferable among several species of the genus *Vitis*  
109 [17]. Since SSRs provide unique fingerprints for cultivar identification [18], they have  
110 been used for genetic resource characterization [19,20], parentage analysis [21,22],  
111 genetic mapping [23,24], detection of quantitative trait loci (QTLs) [25], and assisted  
112 selection [26].

113 Because SSRs are highly reproducible and stable, they have allowed the  
114 development of several reference banks with grapevine variety genetic profiles from  
115 around the world. Access to these reference banks allows the exchange of information

116 between different research groups, significantly increasing international efforts related  
117 to the correct identification of grapevine genetic resources [27].

118 Considering the importance of viticulture and winemaking in Brazil, the  
119 Agronomic Institute of Campinas (IAC) has a *Vitis* spp. germplasm bank including wild  
120 *Vitis* species, interspecific hybrids, and varieties of the main cultivated species (*V.*  
121 *vinifera*, *V. labrusca*, *V. bourquina*, *V. rotundifolia*) and varieties developed by the IAC.

122 Our objective in the present study was to describe the diversity and genetic  
123 structure of the *Vitis* spp. available in this germplasm bank using microsatellite markers.  
124 The accessions were characterized, and their molecular profiles were compared with the  
125 use of different literature and online databases. Here we quantify the genetic diversity of  
126 this Brazilian germplasm and describe its genetic structure, and we suggest the  
127 composition of a core collection that would capture the maximum genetic diversity with  
128 a minimal sample size. We discuss perspectives related to the use of this information in  
129 germplasm management and conservation.

130

## 131 **Materials and Methods**

### 132 **Plant material**

133 A total of 410 accessions from the *Vitis* spp. Germplasm Bank of the IAC in  
134 Jundiaí, São Paulo (SP), Brazil, were analyzed. This germplasm encompasses more than  
135 ten species of *Vitis*, including commercial and noncommercial varieties of wine, table,  
136 and rootstock grapes. Each accession consisted of three clonally propagated plants,  
137 sustained in an espalier system and pruned in August every year, leaving one or two  
138 buds per branch. For sampling, were collected young leaves of a single plant from each  
139 accession. Detailed data on the accessions are available in S1 Table.

140

## 141 **DNA extraction**

142 Total genomic DNA was extracted from young leaves homogenized in a  
143 TissueLyser (Qiagen, Valencia, CA, USA) following the cetyltrimethylammonium  
144 bromide (CTAB) method previously described by Doyle (1991) [28]. The quality and  
145 concentration of the extracted DNA were assessed using 1% agarose gel electrophoresis  
146 with comparison to known quantities of standard  $\lambda$  phage DNA (Invitrogen, Carlsbad,  
147 CA, USA).

148

## 149 **Microsatellite analysis**

150 A set of 17 grapevine SSR markers well characterized in previous studies  
151 [22,29–31] were used, including ten developed by Merdinoglu et al. (2005) [32]  
152 (VVIn74, VVIn09, VVIp25b, VVIn56, VVIn52, VVIq57, VVIp31, VVIp77, VVIv36,  
153 VVIn21) and seven suggested by the guidelines of the European scientific community  
154 for universal grapevine identification, characterization, standardization, and exchange of  
155 information [33,34]: VVS2 [35], VVMD5, VVMD7 [36], VVMD25, VVMD27 [37],  
156 VrZAG62, and VrZAG79 [38]. One primer in each primer pair was 5' labeled with one  
157 of the following fluorescent dyes: 6-FAM, PET, NED, or VIC. Additional information  
158 about the loci is available in S2 Table.

159 Polymerase chain reaction (PCR) was performed using a three-primer labeling  
160 system [39] in a final volume of 10  $\mu$ l containing 20 ng of template DNA, 0.2  $\mu$ M of  
161 each primer, 0.2 mM of each dNTP, 2 mM MgCl<sub>2</sub>, 1 $\times$  PCR buffer (20 mM Tris HCl  
162 [pH 8.4] and 50 mM KCl), and 1 U of Taq DNA polymerase. PCR amplifications were  
163 carried out using the following steps: 5 min of initial denaturation at 95°C followed by  
164 35 cycles of 45 s at 94°C, 45 s at 56°C or 50°C (VVS2, VVMD7, VrZAG62 and  
165 VrZAG79), 1 min 30 s at 72°C, and a final extension step of 7 min at 72°C.

166 Amplifications were checked with 3% agarose gels stained with ethidium bromide. The  
167 amplicons were denatured with formamide and analyzed with an ABI 3500 (Applied  
168 Biosystems, Foster City, CA, USA) automated sequencer. The alleles were scored  
169 against the internal GeneScan-600 (LIZ) Size Standard Kit (Applied Biosystems, Foster  
170 City, CA, USA) using Geneious software v. 8.1.9 [40].

171

## 172 **Genetic diversity analyses**

173 Descriptive statistics for the genotyping data were generated using GenAlEx v.  
174 6.5 [41] to indicate the number of alleles per locus ( $N_a$ ), effective number of alleles  
175 ( $N_e$ ), observed heterozygosity ( $H_o$ ), expected heterozygosity ( $H_E$ ), and fixation index  
176 ( $F$ ). GenAlEx software was also used to identify private ( $P_a$ ) and rare alleles (frequency  
177  $< 0.05$ ).

178 The polymorphism information content (PIC), discriminating power ( $D_j$ ), and  
179 null allele frequency ( $r$ ) were calculated to evaluate the efficiency and discriminatory  
180 potential of each microsatellite marker. Polymorphism information content (PIC) was  
181 calculated using Cervus 3.0.7 [42] according to the expression  $PIC = 1 - \sum_{i=1}^n p_i^2 -$   
182  $\sum_{i=1}^n \sum_{j=i+1}^n 2p_i^2 p_j^2$ , where  $n$  is the number of alleles, and  $p_i$  and  $p_j$  are the frequencies  
183 of the  $i^{\text{th}}$  and  $j^{\text{th}}$  alleles [43]. Discriminating power ( $D_j$ ) values were estimated to  
184 compare the efficiencies of microsatellite markers in varietal identification and  
185 differentiation. This parameter was calculated in accordance with the formula as  
186 follows:  $D_j = 1 - C_j = 1 - \sum_{i=1}^I p_i \frac{N p_i - 1}{N - 1}$ , where  $D_j$  is the probability that two  
187 randomly selected samples have different and distinct banding patterns,  $p_i$  is the  
188 frequency of the  $i^{\text{th}}$  pattern revealed by each marker,  $N$  is the number of samples  
189 analyzed, and  $I$  is the total number of patterns generated by each marker [44].



190 The null allele frequency ( $r$ ) was estimated using Cervus 3.0.7. By definition, a  
191 microsatellite null allele is any allele at a microsatellite locus that consistently fails to  
192 amplify to detectable levels via the polymerase chain reaction (PCR) [45]. Cervus 3.0.7  
193 uses a iterative likelihood approach [46], in which the presence of null allele  
194 homozygotes is not taken into consideration initially but is added in later optimization  
195 rounds. This method avoids overestimating the frequency of a null allele if samples fail  
196 to amplify for reasons other than the presence of nulls [45].

197

## 198 **Genetic structure analysis**

199 To assess the overall germplasm structuring, three approaches with different  
200 grouping criteria that do not require *a priori* assignment of individuals to groups were  
201 used: a Bayesian model-based approach, a distance-based model using a dissimilarity  
202 matrix, and discriminant analysis of principal components (DAPC).

203 The model-based Bayesian analysis implemented in the software package  
204 STRUCTURE v. 2.3.4 [47] was used to determine the approximate number of genetic  
205 clusters (K) within the full dataset and to assign individuals to the most appropriate  
206 cluster. STRUCTURE can identify subsets of individuals by detecting allele frequency  
207 differences within the data by assigning individuals to sub-populations based on  
208 analysis of likelihoods. The process begins by randomly assigning individuals to a pre-  
209 determined number of groups, after which variant frequencies are estimated in each  
210 group and individuals re-assigned based on those frequency estimates. This process is  
211 repeated many times in the burn-in process that results in a progressive convergence  
212 toward reliable allele frequency estimates in each population and membership  
213 probabilities of individuals to a population. During each analysis, membership  
214 coefficients summing to one are assigned to individuals for each group. If admixture is

215 considered, membership coefficients are generated across multiple clusters. The  
216 assumptions are that loci are unlinked and populations are in Hardy-Weinberg  
217 Equilibrium (HWE) [48]. Additionally, a “hierarchical STRUCTURE analysis” [49]  
218 was applied in this study by running STRUCTURE subsequently for each identified  
219 cluster separately to reveal any underlying structure, as suggested by Pritchard et al.  
220 (2007) [50].

221 All simulations were performed using the admixture model, with 100,000  
222 replicates for burn-in and 1,000,000 replicates for Markov chain Monte Carlo (MCMC)  
223 processes in ten independent runs. The number of clusters (K) tested ranged from 1 to  
224 10.

225 The online tool Structure Harvester [51] was used to analyze the STRUCTURE  
226 output, and the optimal K values were calculated using Evanno’s  $\Delta K$  *ad hoc* statistics  
227 [52]. The optimal alignment over the 10 runs for the optimal K values was obtained  
228 using the greedy algorithm in CLUMPP v.1.1.2 [53], and the results were visualized  
229 using DISTRUCT software v.1.1 [54]. Based on the posterior probability of  
230 membership (q), we classified individuals who showed  $q \geq 0.70$  as members of a given  
231 cluster. In contrast, accessions with a membership of  $q < 0.70$  were classified as  
232 admixed. This procedure was performed to avoid individuals constrained to belong to  
233 any of the given number (K) of clusters.

234 Distance-based methods proceed by calculating a pairwise distance matrix, the  
235 entries of which provide the distance between every pair of individuals. This matrix  
236 may then be represented using some convenient graphical representation, such as a  
237 dendrogram, and clusters may be identified by eye [47]. Genetic distances between  
238 accessions were estimated on the basis of Rogers’ genetic distance [55], and the  
239 resulting distance matrix was used to construct a dendrogram with the neighbor-joining

240 algorithm [56], with 1,000 bootstrap replicates implemented in the R package *poppr*  
241 [57]. The principle of this method is to find pairs of operational taxonomic units that  
242 minimize the total branch length at each stage of clustering starting with a star-like tree  
243 [56]. The final dendrogram was formatted with iTOL v. 5.5 [58].

244 DAPC as implemented in the R package *adegenet* 2.1.2 [59,60] was also  
245 performed. DAPC is a multivariate analysis that does not rely on the assumption of  
246 HWE, the absence of linkage disequilibrium, or specific models of molecular evolution  
247 to identify clusters within genetic data. In DAPC, data are first transformed using a  
248 principal components analysis (PCA), after which a discriminant analysis (DA) is  
249 performed for the retained principal components. This process ensures that variables  
250 submitted to DA are perfectly uncorrelated and that their number is less than that of the  
251 analyzed individuals [61]. The *find.clusters* function was used to detect the number of  
252 clusters in the germplasm, which runs successive K-means clustering with increasing  
253 numbers of clusters (K). We used 20 as the maximum number of clusters. The optimal  
254 number of clusters was estimated using the Bayesian information criterion (BIC), which  
255 reaches a minimum value when the best-supported assignment of individuals to the  
256 appropriate number of clusters is approached. DAPC results are presented as  
257 multidimensional scaling plots.

258

## 259 **Accession name validation**

260 To verify the trueness to type and identify misnamed genotypes, the molecular  
261 profiles obtained in this study were compared with the data contained in the following  
262 online databases: Vitis International Variety Catalogue (VIVC, [www.vivc.de](http://www.vivc.de)), Italian  
263 Vitis Database (<http://www.vitisdb.it>), “PI@ntGrape, le catalogue des vignes cultivées  
264 en France” (<http://plantgrape.plantnet-project.org/fr>) and the U.S. National Plant

265 Germplasm System (NPGS, <https://npgsweb.ars-grin.gov/gringlobal/search.aspx>). For  
266 this comparison, the molecular profile of seven microsatellite loci (VVS2, VVMD5,  
267 VVMD7, VVMD25, VVMD27, VrZAG62, VrZAG79) adopted by the databases was  
268 used.

269 The allele sizes were first standardized for consistency with various references  
270 [62]. If an accession was not listed in these databases, it was verified in other scientific  
271 papers.

272

## 273 **Core collection sampling**

274 The R package *corehunter* 3.0 [63] was used to generate the core collection to  
275 represent the maximum germplasm genetic variability in a reduced number of  
276 accessions. Different samples were generated by changing the *size* parameter of the  
277 desired core collections to identify the subset of genotypes that could capture the entire  
278 diversity of alleles. The sizes ranged from 0.1 to 0.3 for all datasets. For each sample,  
279 the genetic diversity parameters were determined with GenAEx v. 6.5 [41].

280

## 281 **Ethics statement**

282 We confirm that no specific permits were required to collect the leaves used in  
283 this study. This work was a collaborative study performed by researchers from the IAC  
284 (SP, Brazil), São Paulo's Agency for Agribusiness Technology (APTA, SP, Brazil), and  
285 the State University of Campinas (UNICAMP, SP, Brazil). Additionally, we confirm  
286 that this study did not involve endangered or protected species.

287

## 288 **Results**

## 289 Genetic diversity

290 Four hundred and ten grapevine accessions of *Vitis* spp. were analyzed at 17  
291 SSR loci (S1 Table), and a total of 304 alleles were detected (Table 1). The number of  
292 alleles per SSR locus ( $N_a$ ) ranged from 10 (VVIq57) to 24 (VVIp31), with an average  
293 of 17.88. The number of effective alleles per locus ( $N_e$ ) varied from 2.39 (VVIq57) to  
294 11.40 (VVIp31), with a mean value of 7.02.

295

296 **Table 1.** Genetic parameters of the 17 microsatellite loci obtained from 410 grapevine  
297 accessions.

| Locus        | $N_a$ | $N_e$  | $H_o$ | $H_E$ | PIC  | $D_j$ | $r$  |
|--------------|-------|--------|-------|-------|------|-------|------|
| VVIn74       | 18    | 5.32   | 0.65  | 0.81  | 0.79 | 0.81  | 0.10 |
| VVIr09       | 21    | 8.33   | 0.83  | 0.88  | 0.87 | 0.88  | 0.02 |
| VVIp25b      | 21    | 4.15   | 0.48  | 0.75  | 0.73 | 0.76  | 0.21 |
| VVIn56       | 12    | 3.27   | 0.60  | 0.69  | 0.65 | 0.69  | 0.06 |
| VVIn52       | 13    | 7.87   | 0.58  | 0.87  | 0.86 | 0.87  | 0.20 |
| VVIq57       | 10    | 2.39   | 0.56  | 0.58  | 0.52 | 0.58  | 0.00 |
| VVIp31       | 24    | 11.14  | 0.88  | 0.91  | 0.90 | 0.91  | 0.01 |
| VVIp77       | 23    | 8.22   | 0.76  | 0.87  | 0.86 | 0.88  | 0.06 |
| VVIv36       | 15    | 4.74   | 0.79  | 0.78  | 0.76 | 0.79  | 0.00 |
| VVIr21       | 17    | 6.74   | 0.83  | 0.85  | 0.83 | 0.85  | 0.01 |
| VVS2         | 20    | 8.25   | 0.86  | 0.87  | 0.86 | 0.88  | 0.00 |
| VVMD5        | 18    | 8.80   | 0.76  | 0.88  | 0.87 | 0.88  | 0.07 |
| VVMD7        | 17    | 9.18   | 0.87  | 0.89  | 0.88 | 0.89  | 0.00 |
| VVMD25       | 19    | 5.91   | 0.75  | 0.83  | 0.81 | 0.83  | 0.04 |
| VVMD27       | 22    | 7.99   | 0.87  | 0.87  | 0.86 | 0.87  | 0.00 |
| VrZAG62      | 18    | 8.32   | 0.84  | 0.88  | 0.86 | 0.88  | 0.01 |
| VrZAG79      | 16    | 8.74   | 0.85  | 0.88  | 0.87 | 0.88  | 0.01 |
| <b>Total</b> | 304   | 119.42 |       |       |      |       |      |
| <b>Mean</b>  | 17.88 | 7.02   | 0.75  | 0.83  | 0.81 | 0.83  |      |
| <b>SE*</b>   | 0.93  | 0.57   | 0.03  | 0.02  | 0.02 | 0.02  |      |

298 Number of alleles ( $N_a$ ), number of effective alleles ( $N_e$ ), observed heterozygosity ( $H_o$ ),  
299 expected heterozygosity ( $H_e$ ), polymorphic information content (PIC), discrimination  
300 power ( $D_j$ ), estimated frequency of null alleles ( $r$ ).

301 \*Standard error of mean values.

302

303 Across all the accessions, the mean observed heterozygosity ( $H_o$ ) was 0.75  
304 (ranging from 0.48 to 0.88). The expected heterozygosity ( $H_e$ ) was higher than the  
305 observed heterozygosity ( $H_o$ ) for most loci, except for VVIv36. Among these loci  
306 ( $H_o < H_e$ ), the probability of null alleles ( $r$ ) was significantly high ( $>0.20$ ) only for  
307 VVIp25b and VVIIn52. The analysis revealed a high  $H_e$  level, ranging from 0.58  
308 (VVIq57) to 0.91 (VVIp31), with a mean of 0.83.

309 The PIC estimates varied from 0.52 (VVIq57) to 0.90 (VVIp31), with a mean  
310 value of 0.81. The discrimination power ( $D_j$ ) was greater than 0.80 for 13 of the 17 loci,  
311 with the highest value for the VVIp31 locus (0.91). The  $D_j$  values were high for 76.5%  
312 of the SSR markers used ( $>0.80$ ). When the PIC and  $D_j$  of each locus were analyzed  
313 together, 12 loci presented the highest values for both indexes ( $>0.80$ ). In this study, the  
314 largest amount of information was provided by VVIp31, for which 24 alleles were  
315 detected showing a PIC and a  $D_j \geq 0.90$ .

316

## 317 **Evaluation of genetic relationships and germplasm structure**

318

319 The STRUCTURE analysis indicated the relatedness among the 410 accessions,  
320 with the highest  $\Delta K$  value for  $K = 3$ , suggesting that three genetic clusters were  
321 sufficient to interpret our data (Fig 1).

322

323 **Fig 1. STRUCTURE Harvester results.** The most probable number of genetic clusters  
324 (K) within the full data set of 410 individuals based on the method described by Evanno  
325 et al. (2005) [51]. Delta K graph determined the maximum value at K = 3.

326

327 Based on a membership probability threshold of 0.70, 207 accessions were  
328 assigned to cluster 1, 54 accessions were assigned to cluster 2, and 51 accessions were  
329 assigned to cluster 3. The remaining 98 accessions were assigned to the admixed group.  
330 The level of clustering (K = 3) is related to the main accession species. Cluster 1 was  
331 formed by accessions with the greatest relation to *V. vinifera*. Cluster 2 contained the  
332 accessions most related to *V. labrusca*. Accessions linked to wild *Vitis* species were  
333 allocated to cluster 3. All accessions assigned to the admixed group were identified as  
334 interspecific hybrids (Fig 2A).

335

336 **Fig 2. Genetic structure of the *Vitis* germplasm accessions obtained on the basis of**  
337 **17 microsatellite markers.** Bar graphs of the estimated membership proportions (q) for  
338 each of the 410 accessions. Each accession is represented by a single vertical line,  
339 which is partitioned into colored segments in proportion to the estimated membership in  
340 each cluster. [A] First round of STRUCTURE analysis, inferred genetic structure for K  
341 = 3. Cluster 1 (C1): genetic predominance of the species *V. vinifera*; cluster 2 (C2):  
342 genetic predominance of the species *V. labrusca*; cluster 3 (C3): genetic predominance  
343 of wild *Vitis* species; Admixture: interspecific hybrids with a membership of  $q < 0.70$ .  
344 [B] Second round of STRUCTURE analysis. WG: wine grape accessions related to *V.*  
345 *vinifera*; TG: table grape accessions related to *V. vinifera*; NG: ‘Niagara’ accessions; IS:  
346 ‘Ives’ and ‘Isabella’ accessions; L1 and L2: Others *V. labrusca* hybrids; WV: accessions

347 related to wild *Vitis* species; VR: *V. rotundifolia* accessions; SS: accessions related to  
348 the Seibel series; OH: complex interspecific hybrids.

349

350 Of the 304 observed alleles, 227 were shared among the groups; the remaining  
351 77 represented private alleles (Pa) in different groups of accessions (Fig 3). The  
352 VVMD27 locus had the largest number of private alleles of the 17 SSR markers used in  
353 this study (9). Clusters 1 and 2, constituted by accessions related to the most cultivated  
354 species of grapevine, *V. vinifera* and *V. labrusca*, respectively, had the smallest number  
355 of private alleles (5 and 1, respectively). The largest number of private alleles was found  
356 in cluster 3 (53), constituting 72.60% of the total private alleles.

357

358 **Fig 3. Private allele (Pa) frequencies obtained from the genotyping of 410**  
359 **grapevine accessions on the basis of 17 microsatellite loci.** X-axis: Private alleles  
360 frequencies; Y-axis: groups identified by STRUCTURE analyses at  $K = 3$ . The dashed  
361 line indicates the cutoff for the occurrence of rare alleles (frequency = 0.05).

362

363 A subsequent round (second round) of STRUCTURE allowed the identification  
364 of secondary clusters within the three main genetic clusters (Fig 2B). In Cluster 1, the  
365 accessions were divided into two subgroups ( $K = 2$ ), one formed mainly by wine grapes  
366 (WG) ( $n = 115$ ) and the other by table grapes (VT) ( $n = 92$ ). This finer-scale clustering  
367 divided Cluster 2 into 4 subgroups ( $K = 4$ ). The NG subgroup ( $n = 15$ ) was composed of  
368 ‘Niagara’ and its mutations. In the IS subgroup ( $n = 11$ ), the cultivars Ives, Isabella, and  
369 Isabella mutations were found. The remaining *V. labrusca* hybrids were allocated to  
370 subgroups L1 ( $n = 18$ ) and L2 ( $n = 10$ ). In cluster 3, the second round also divided the  
371 accessions into two subgroups ( $K = 2$ ), the *V. rotundifolia* accessions were assigned to



372 the VR subgroup (n = 11), and the others accessions related to wild *Vitis* species were  
373 allocated to the WV subgroup (n = 40).

374 Although the Admixture group contained a large number of heterogeneous  
375 accessions, a subsequent round of STRUCTURE was also performed on this set to  
376 identify possible clustering patterns. As a result, the analysis revealed the presence of  
377 two subgroups (K = 2). Accessions of the Seibel series and hybrids including cultivars  
378 of this complex in their genealogy were separated from the other hybrids and assigned  
379 to the SS subgroup (n = 31). The remaining 67 accessions of the Admixture group were  
380 in the OH subgroup.

381 Additionally, DAPC was performed with no prior information about the  
382 groupings of the evaluated accessions. Inspection of the BIC values (S1 Fig.) revealed  
383 that the division of the accessions into nine clusters was the most likely scheme to  
384 explain the variance in this set of accessions. In the preliminary step of data  
385 transformation, the maintenance of 120 principal components (PCs) allowed the DAPC  
386 to explain 94% of the total genetic variation.

387 Initially, the DAPC scatterplot based on the first and second discriminant  
388 functions showed the formation of three main distinct groups, with great genetic  
389 differentiation of clusters 8 (dark green) and 9 (green) from the others (Fig 4A). In a  
390 subsequent DAPC, outlier clusters 8 and 9 were removed to improve the visualization  
391 of the relationship of the other clusters (Fig 4B). In this second scatterplot, clusters 1  
392 (magenta) and 7 (purple) showed greater genetic differentiation, with low variance  
393 within the groups, as well as no case of overlap with another cluster, indicating a strong  
394 genetic structure. The maintenance of 250 principal components (PCs) allowed the  
395 second DAPC to explain 100% of the total genetic variation.

396

397 **Fig 4. DAPC scatterplots based on the K-means algorithm used to identify the**  
398 **proper number of clusters.** Dots represent individuals, and the clusters are presented  
399 in different colors. The accessions were allocated into nine clusters: 1 (magenta), related  
400 to the Seibel series; 2 (yellow), related to table grape accessions of *V. vinifera*; 3  
401 (orange) and 5 (red), related to wine grape accessions of *V. vinifera*; 4 (brown),  
402 predominance of IAC hybrids; 6 (blue) and 7 (purple), related to the species *V.*  
403 *labrusca*; 8 (dark green), related to wild *Vitis* species; and 9 (green), *V. rotundifolia*  
404 accessions. [A] DAPC with all samples included. [B] DAPC excluding clusters 8 and 9.  
405

406 The allocation of individuals into clusters according to the DAPC showed  
407 several similarities to those achieved in the second round of STRUCTURE, and both  
408 analyses showed the same pattern of clustering. Essentially, clusters 1 (magenta), 2  
409 (yellow), 8 (dark green), and 9 (green) of the DAPC reflected the subgroups SS, TG,  
410 VR, and WV detected by the STRUCTURE second round, respectively, and the WG  
411 subgroup corresponded to DAPC clusters 5 (red) and 3 (orange).

412 In the case of the *V. labrusca* hybrids, the analyses resulted in a slightly different  
413 division. DAPC separated these accessions in clusters 6 (blue) and 7 (purple), basically  
414 assigning ‘Niagara’ accessions in cluster 6 and the other *V. labrusca* hybrids in cluster  
415 7. The STRUCTURE second round also identified ‘Niagara’ accessions as a separate  
416 group (NG); however, a more refined division was performed in the other hybrids,  
417 separating them into 3 subgroups. DAPC cluster 4 (brown) did not correspond to any  
418 subgroup identified by the STRUCTURE second round; this cluster was formed mostly  
419 by hybrids developed by the IAC breeding program used as table grapes.

420 Finally, we constructed a dendrogram using the neighbor-joining method from  
421 the distance matrix based on Rogers’ distance to confirm the relationships among the

422 accessions (Fig 5). The dendrogram showed a pattern that was consistent with those  
423 from the above-described two analyses. The group formed by the *V. rotundifolia*  
424 accessions and the other wild species was clearly separated from the cultivated *Vitis*  
425 species, as seen in the DAPC. There was also a strong separation between accessions  
426 related to *V. labrusca* and other accessions. The wine grape accessions of *V. vinifera*  
427 were mainly concentrated at the top of the dendrogram, while the table grape accessions  
428 of this species were found at the bottom. However, the other hybrids (IAC, Seibel  
429 series, and others) were scattered among all the groups formed by the dendrogram.

430

431 **Fig 5. Neighbor-joining dendrogram based on Rogers' distance calculated from the**  
432 **dataset of 17 microsatellite markers across 410 grapevine accessions.** Accessions  
433 colored according to species group.

434

### 435 **Validation analysis of molecular profiles**

436 The identification of 145 accessions was validated through matches with data  
437 available in the literature and databases. The results also confirmed matches to reference  
438 profiles of clones based on somatic mutations. Another 42 accessions showed molecular  
439 profiles that matched a validated reference profile of a different prime name, indicating  
440 mislabeling (S1 Table).

441 The molecular profiles of the remaining 223 accessions did not match any  
442 available reference profile. This accession group included wild species and cultivars  
443 from grapevine breeding programs in Brazil (the IAC and Embrapa), the United States,  
444 and France (Seibel series). The molecular profiles of more than 100 hybrids developed  
445 by the IAC were reported for the first time.

446 The accessions ‘101-14’, ‘Bailey’, ‘Black July’, ‘Carlos’, ‘Carman’, ‘Castelão’,  
447 ‘Catawba Rosa’, ‘Elvira’, ‘Moscatel de Alexandria’, and ‘Regent’ showed a different  
448 profile than the reference profile of the same name and did not match any other  
449 available reference profile. However, additional morphological and source information  
450 is needed to validate their identification. To avoid possible confusion, these accessions  
451 were indicated as “Unknown”.

452 After correcting the mislabeling, 22 cases of duplicates were identified, all with  
453 accessions of the same name and the same molecular profile. Accessions identified with  
454 different names but having the same molecular profile were classified as synonyms.  
455 Thirty-one synonymous groups were elucidated in this study (S3 Table). Some  
456 accessions classified as “Unknown” showed genetic profiles identical to accessions that  
457 did not match any available reference profile; examples can be seen in synonymous  
458 groups 1, 2, 5, and 6 in S3 Table.

459

## 460 **Core collection**

461 Three independent sampling proportions were constructed with a size ranging  
462 from 10 to 30% of the entire dataset to identify the smallest set of accessions that would  
463 be able to represent as much of the available genetic diversity as possible (Table 2).  
464 Core 3, composed of 120 accessions, managed to capture 100% of the 304 detected  
465 alleles, while the smallest sample (Core 1) managed to capture 243 alleles,  
466 approximately 20% less than the total number of alleles detected. The genetic diversity  
467 index values obtained for the samples were similar to or higher than those for the entire  
468 germplasm. The  $H_O$  values ranged from 0.64 (Core 1) to 0.70 (Core 3); the value for  
469 Core 3 was similar to that detected for all 410 accessions (0.75). The three samples  
470 showed  $H_E$  and  $N_e$  values higher than those observed for the entire dataset. The  $H_E$

471 values for all samples were 0.85, while  $N_e$  ranged from 134.53 (Core 2) to 137.69 (Core  
472 3). The values of  $N_e$  and  $H_E$  are related to allele frequencies, and low values of allele  
473 frequencies generate even lower values when squared. With a reduction in the number  
474 of accessions ( $N$ ), the low-frequency alleles (allele frequency between 0.05 to 0.25) and  
475 rare alleles (frequency less than 0.05) showed an increase in frequency, resulting in an  
476 increase in  $N_e$  and  $H_E$ .

477

478 **Table 2.** SSR diversity within each core collection compared with that of the entire  
479 dataset (IAC collection).

| Sample Name    | Size | N   | Na  | Ne     | $H_O^*$     | $H_E^*$     | Total SSR diversity captured (%) |
|----------------|------|-----|-----|--------|-------------|-------------|----------------------------------|
| Core 1         | 0.1  | 41  | 243 | 136.22 | 0.64 (0.03) | 0.85 (0.01) | 79.93                            |
| Core 2         | 0.2  | 82  | 275 | 134.53 | 0.69 (0.04) | 0.85 (0.02) | 90.46                            |
| Core 3         | 0.3  | 120 | 304 | 137.69 | 0.70 (0.03) | 0.85 (0.01) | 100                              |
| IAC collection | 1.0  | 410 | 304 | 119.42 | 0.75 (0.03) | 0.83 (0.02) | 100                              |

480 Number of accessions ( $N$ ), number of alleles ( $N_a$ ), number of effective alleles ( $N_e$ ),  
481 observed heterozygosity ( $H_O$ ), expected heterozygosity ( $H_E$ )

482 \*Standard error in parentheses.

483

484 Core 3 sample was the only one that managed to capture 100% of the alleles,  
485 being the best option for use in breeding as a core collection. All clusters detected in the  
486 STRUCTURE analysis and DAPC are represented in Core 3. In particular, in the  
487 STRUCTURE analysis at  $K = 3$ , 49 accessions were in cluster 1, 12 were in cluster 2,  
488 29 were in cluster 3, and 30 were in the admixture group, representing 41, 10, 24, and  
489 25% of Core 3, respectively.

490

## 491 **Discussion**

### 492 **Genetic diversity**

493           The results of this study revealed high levels of genetic diversity among the  
494 evaluated accessions. The observed high genetic diversity was expected since the grape  
495 germplasm from the IAC includes varieties with very diverse origins, wild species, and  
496 different intra- and interspecific hybrids.

497           We detected a  $H_E$  of 0.83 across the entire accession set in the 17 evaluated loci  
498 (Table 1). This result is similar to those found in other Brazilian germplasm banks  
499 characterized by containing European and American cultivars and an abundance of  
500 interspecific hybrids [64,65]. However, this value was higher than that in the Iranian  
501 [11] (0.72), Turkish (0.75) [66], and Spanish (0.71) [67] collections, which possessed  
502 only *V. vinifera* accessions.

503           The large number of alleles per locus identified (~18) was likely due to the  
504 taxonomic amplitude of the germplasm since a relatively large number of low-  
505 frequency alleles were found in wild species accessions. Lamboy and Alpha (1998)  
506 [17], when analyzing the diversity of 110 accessions belonging to 21 species of *Vitis*  
507 and 4 hybrids, detected 24.4 alleles per locus, a greater quantity than that observed in  
508 this study, showing that taxonomically broader accessions contribute to a greater  
509 number of alleles.

510           Most loci had lower  $H_O$  values than those expected from the randomized union  
511 of gametes ( $H_E$ ), except for VVIv36. For these loci, the probability of null alleles was  
512 positive but significantly high (> 0.20) for only VVIp25b and VVIn52. This finding  
513 suggests that at these loci, some of the apparent homozygotes could be heterozygous,  
514 with one allele being visible and the other not. Such null alleles can occur when  
515 mutations prevent the linking of primers to the target region [68].

516 The high number of alleles obtained by the 17 SSR primer set positively  
517 impacted the PIC and discrimination power ( $D_j$ ). PIC is an indicator of a marker's  
518 informative ability in genetic studies (segregation, population identification, and  
519 paternity control), and its value reflects the polymorphism of the marker in the  
520 population studied. According to the classification of Botstein et al. (1980) [43], all the  
521 loci used can be considered highly informative ( $PIC > 0.50$ ). The high  $D_j$  values  
522 demonstrate that the microsatellite markers used in this study can be considered very  
523 effective for grape cultivar discrimination and could be valid to distinguish other  
524 accessions that could be introduced into the collection.

525

## 526 **Structure and genetic relationship of accessions**

527 The genetic structure was mostly impacted by two factors that are difficult to  
528 separate: clear discrimination based on species and human usage as wine, table, or  
529 rootstock grapes, as previously noted by Laucou et al. (2018) [69] and Emanuelli et al.  
530 (2013) [70]. A population structure analysis using the software STRUCTURE revealed  
531 the presence of three primary clusters in our set of accessions based on the species *V.*  
532 *vinifera*, *V. labrusca*, and wild *Vitis*. This first structural level is also evidenced in the  
533 DAPC analysis and neighbor-joining dendrogram, where it is possible to observe a clear  
534 distinction of the accessions associated with *V. labrusca* and wild species.

535 However, a large number of accessions were not assigned and remained in a  
536 large admixed group, evidencing the genetic complexity of the analyzed plant material.  
537 Many of these accessions are crossbreeds between native vine species found in North  
538 America such as *V. riparia* Michaux, *V. rupestris* Scheele Michx, and *V. labrusca* L.,  
539 and a number *V. vinifera* L. cultivars from Europe. The intra- and interspecific crossings  
540 carried out during breeding cycles in search of novelties and hybrid vigor promote the

541 miscegenation of grapevine cultivars, resulting in hybrids with a heterogeneous genetic  
542 composition.

543           The assignment of these hybrids to groups based on species is often difficult, as  
544 these individuals certainly carry alleles from different gene pools, being in an  
545 intermediate position and belonging simultaneously to more than one cluster. The  
546 accessions ‘Campos da Paz’ and ‘IAC 0457-11 Iracema’ are examples of this condition.  
547 ‘Campos da Paz’ is an interspecific hybrid resulting from the cross between the  
548 cultivated species *V. vinifera* and the wild species *V. rupestris*. The mixture of two  
549 genomes was detected by STRUCTURE, which assigned a membership probability  
550 threshold of 0.55 and 0.45 to clusters 1 and 3 respectively, representing the genetic  
551 clusters of the two parental species. A similar situation was observed for the accession  
552 ‘IAC 0457-11 Iracema’ developed from the cross between the species *V. vinifera* and *V.*  
553 *labrusca*, represented by genetic groups 1 and 2, respectively. The hybrid presented an  
554 intermediate membership of 0.5 to the two groups. The other accessions from  
555 Admixture group exhibited a similar or even more complex origin than these examples,  
556 and some of them were derived from crosses between more than three species, having  
557 associations with the three clusters simultaneously.

558           Our results demonstrated the largest number of private alleles in cluster 3  
559 composed of the wild germplasm (Fig 3). This finding confirms that wild accessions are  
560 important reservoirs of genetic variation, with the potential for incorporating new  
561 materials into breeding programs in response to the demand for the development of  
562 cultivars with different characteristics. Wild grape germplasm is a potential source of  
563 unique alleles and provides the breeder with a set of genetic resources that may be  
564 useful in the development of cultivars that are resistant to pests and diseases, tolerant to



565 abiotic stresses, and even show enhanced productivity, which makes their conservation  
566 of paramount importance [71].

567         The second round of STRUCTURE (Fig 2B) identified similar DAPC clustering  
568 patterns (Fig 4), in which the genotypes from *V. vinifera* were separated according to  
569 their use. The WG subgroup was composed mainly of wine grapes, such as the  
570 accessions ‘Syrah’, ‘Merlot Noir’, ‘Chenin Blanc’, ‘Petit Verdot’, and ‘Cabernet  
571 Sauvignon’, which showed associations with a membership greater than 0.95,  
572 corresponding to DAPC clusters 5 (red) and 3 (orange). The *V. vinifera* accessions of  
573 table grapes as ‘Centennial Seedless’, ‘Aigezard’, ‘Moscatel de Hamburgo’, and ‘Italia’  
574 and their mutations ‘Benitaka’, ‘Rubi’, and ‘Brazil’ were found in the TG subgroup.  
575 This subgroup corresponded to cluster 2 (yellow) in the DAPC. In the neighbor-joining  
576 dendrogram, the *V. vinifera* accessions were also completely separated in terms of use;  
577 the wine grapes were located at the top, and the table grapes were located at the bottom.  
578 This result showed that the strong artificial selection based on human usage with wine  
579 or table influenced the genetic structure within the cultivated compartment of grapevine,  
580 as previously identified in previous studies [69,72].

581         In the DAPC and neighbor-joining dendrogram, two groups were differentiated  
582 to a greater extent than the others (Fig 4 and Fig 5), with these groups being formed  
583 mainly of wild grapes that are often used as rootstocks. This phenomenon likely  
584 occurred because few rootstocks used worldwide contain part of the *V. vinifera* genome  
585 [9], while practically all table and wine grape hybrids present in this germplasm contain  
586 a part of it. In DAPC analyses, the *V. rotundifolia* accessions constituted the most  
587 divergent group. This species is the only one in the germplasm belonging to the  
588 *Muscadinia* subgenus, which contains plants with  $2n = 40$  chromosomes, while the  
589 others belong to the *Euvitis* subgenus, with  $2n = 38$  chromosomes. A high genetic

590 divergence between *V. rotundifolia* and the species in the *Euvitis* subgenus was also  
591 observed by Costa et al. (2017) [73] through the use of RAPD molecular markers and  
592 by Miller et al. (2013) [74] through SNPs. The species *V. rotundifolia* is resistant to  
593 several grapevine pests and diseases [75] and is an important source of genetic material  
594 in the development of cultivars and rootstocks adapted to the most diverse  
595 environmental conditions and with tolerance and/or resistance to biotic and abiotic  
596 factors.

597         The DAPC cluster 1 was formed by only accessions of the Seibel series and  
598 hybrids with varieties of this series in their genealogy. The Seibel series is in fact a  
599 generic term that refers to several hybrid grapes developed in France at the end of the  
600 19th century by Albert Seibel from crosses between European *V. vinifera* varieties and  
601 wild American *Vitis* species to develop phylloxera-resistant cultivars with  
602 characteristics of fine European grapes [76]. As these hybrids are derived from crosses  
603 among three or more species, most of them were identified as Admixture in the first  
604 round of the STRUCTURE. A second round of STRUCTURE was carried out in the  
605 Admixture group to confirm the structure of these accessions as shown by DAPC. As a  
606 result, the Seibel series accessions were separated from the other hybrids to form a  
607 subgroup, confirming the existence of a distinct gene pool. The combinations of alleles  
608 of different *Vitis* species clearly created unique genetic pools, with many related  
609 accessions, since they were developed using the same breeding program, which explains  
610 the grouping and genetic distinction.

611         The *V. labrusca* hybrids formed distinct groups in the three analyses. In the  
612 DAPC, this accession group was subdivided into two clusters (6 and 7) indicating the  
613 presence of a secondary structure between them (Fig 4). Cluster 6 contained only table  
614 grape cultivars, including ‘Eumelan’, ‘Niabell’, ‘Highland’, ‘Niagara’, and their

615 mutations, while grape cultivars for processing, including ‘Isabella’, ‘Ives’, and  
616 ‘Concord Precoce’ were included in cluster 7. In the STRUCTURE second round, these  
617 accessions had a more pronounced division (Fig 2B), and the cultivars Niagara and  
618 Isabella together with their mutations were assigned to subgroups NG and IS,  
619 respectively, while the other accessions were distributed between subgroups L1 and L2.  
620 This refined secondary structuring was probably due to the hierarchical STRUCTURE  
621 method, since the sensitivity of the program is increased when using a primary cluster in  
622 isolation that allows for more detailed subdivisions [49].

623         The IAC breeding program started in 1943 with the aim of obtaining varieties of  
624 wine grapes, table grapes, and rootstocks. The first introductions in the Germplasm  
625 Bank constituted *V. viniferas* cultivars and Seibel series hybrids originating in France.  
626 Subsequently, wild species and *V. labrusca* hybrids from North America were  
627 introduced. Varieties developed around the world continued to be introduced into the  
628 IAC germplasm (Table S1) over time, which currently has a large number of accesses  
629 originating mainly from the United States, France, and Italy, which correspond to  
630 19.51%, 18.04%, and 8.78% of the germplasm, respectively. In smaller quantities,  
631 varieties from Argentina, Germany, Armenia, Spain, Japan, Portugal, and other  
632 countries are also found.

633         Many of the *V. vinifera* cultivars of the IAC germplasm originating in France,  
634 Italy, and Spain are common among grapevine germplasms worldwide, and their use in  
635 other studies of genetic diversity has been reported [67,69,77–80]. The American and  
636 Brazilian hybrids present in the germplasm are more restricted to collections in North  
637 and South America, being rarely reported in European studies [10,65,68].

638         With the results of the first crosses in the IAC breeding program, the hybrids  
639 with outstanding characteristics started to be used as parents [81]. Since the beginning

640 of the program, more than 2,000 crosses have been performed over 50 years, using more  
641 than 800 parents [82]. Currently the germplasm has 134 accessions developed from  
642 these crossings, corresponding to 32.70% of the entire germplasm. Most of these  
643 hybrids are exclusive to this germplasm, and the molecular profiles of 109 are described  
644 for the first time in this study.

645 The broad genetic base and different objectives of the IAC breeding program  
646 were responsible for the development of hybrids with a wide genetic diversity, as  
647 evidenced in the three analyses revealing IAC hybrids in practically all the clusters. In  
648 the dendrogram, the IAC hybrids were highlighted to facilitate this perception (Fig 5).  
649 Over time, there has been a decrease in the importance of the wine industry in the State  
650 of São Paulo, and the search for table grape varieties has become predominant [82].  
651 Some of these table grape hybrids developed by the IAC formed cluster 4 of the DAPC.  
652 The clustering of these hybrids is similar to the case of the Seibel series accessions,  
653 where the combinations of alleles from different crossings were probably responsible  
654 for the creation of a unique gene pool.

655 The analyses grouped most of the hybrids with one of their parents; however,  
656 cases in which the hybrids were not grouped with any of the parents occurred. Hybrids  
657 originating from the same crosses were not always grouped with the same parent. For  
658 example, the hybrids ‘IAC 0871-41 Patrícia’ and ‘IAC 0871-13 A Dona’ both resulted  
659 from the same crossing between hybrids ‘IAC 0501-06 Soraya’ and ‘IAC 0544-14’  
660 located in DAPC clusters 2 and 3, respectively, hybrid ‘IAC 0871-41 Patrícia’ was  
661 grouped with its parent ‘IAC 0501-06 Soraya’, while ‘IAC 0871-13 A Dona’ was  
662 grouped with ‘IAC 0544-14’. These findings are easily explained when we consider the  
663 genetic biology of the grapevine. In general, grapevine cultivars are highly  
664 heterozygous, and crossing between divergent parents results in a highly segregating

665 progeny. In the same progeny, the hybrids are heterogeneous, and they can present  
666 characteristics similar to both parents, similar to only one parent, or even different from  
667 both parents [83].

668         Since many of the accessions were introduced from different parts of the world  
669 and some others have a complex pedigree, it can be difficult to determine their true  
670 relationship. In the absence of information on the genetic relationships among most  
671 genotypes, it is not possible to determine the most accurate method of grouping.  
672 Although the use of multivariate techniques in the recognition of genetic diversity  
673 imposes a certain degree of structure in the data, and it is important to use different  
674 grouping criteria and the correct structure resulting from most of them to ensure that the  
675 obtained result is not an artifact of the technique used. The use of more than one  
676 clustering method, due to differences in hierarchization, optimization, and ordering of  
677 groups allows the classification to be complemented according to the criteria utilized by  
678 each technique and prevents erroneous inferences from being adopted in the allocation  
679 of materials within a given subgroup of genotypes [84].

680         The STRUCTURE grouping method could be contested because human  
681 manipulation of cultivars (displacements, breeding, clonal propagation) can generate a  
682 deviation from Hardy-Weinberg equilibrium; however, in our study, STRUCTURE  
683 analysis provided a very consistent attribution of genotypes to clusters. The Admixture  
684 group reflects the crossing among genotypes of the three groups identified in the first  
685 round of STRUCTURE corresponding to breeding activities in search of novelties and  
686 hybrid vigor. Furthermore, this analysis provides important information regarding the  
687 genetic composition of the hybrids, providing information about the proportion of each  
688 species in their genome. The three primary genetic groups of STRUCTURE were easily  
689 distinguished in the other analyses; however, in the DAPC analysis, new levels of

690 structure were revealed within these primary groups. The DAPC analysis also provided  
691 information about the genetic divergence between the clusters, allowing the  
692 identification of related ones.

693 The STRUCTURE second round was carried out to investigate the presence of  
694 subclusters within the primary clusters and simultaneously validate the levels of  
695 structure obtained in the DAPC analysis. Most of the subgroups found in the  
696 STRUCTURE second round corresponded to the division obtained by the DAPC  
697 analysis, although some structural levels were different. These differences between  
698 analyses do not invalidate their results but rather bring complementary information that  
699 enhances understanding of the genetic structure and genetic relationship of germplasm  
700 accessions. The grouping based on the species of accessions was also evidenced by  
701 neighbor-joining dendrogram, but the differential of this analysis further provided visual  
702 information on the genetic relationship of the accessions within the groups. In the  
703 dendrogram, the genetic distance between two specific individuals was easily verified,  
704 providing a useful tool in breeding programs, mainly for the selection of divergent  
705 parents.

706 The information obtained by the STRUCTURE, DAPC, and neighbor-joining  
707 dendrogram provides important knowledge for the management of germplasm diversity.  
708 The identification of divergent groups guides crossings in breeding programs,  
709 facilitating the appropriate combination of parents to obtain progeny with wide genetic  
710 variability, allowing the maximization of heterosis and making it possible to obtain  
711 individuals with superior characteristics. Information about the available genetic  
712 diversity is valuable because if properly explored, it can reduce vulnerability to genetic  
713 erosion through the avoidance of crosses between genetically related genotypes while

714 also accelerating genetic progress related to characteristics of importance to grape  
715 growth [85].

716

## 717 **Identification analysis: misnamed and synonymous cases**

718         Considering the vast diversity of names for the different varieties of grapevine,  
719 standardization is necessary. Errors due to homonyms, synonyms, differences in  
720 spelling, and misnamed accessions impede estimation of the real number of different  
721 accessions that are present in grapevine collections, with a negative impact on grapevine  
722 breeding programs. Therefore, the verification of true-to-type accessions is  
723 indispensable [33]. For grapevine, a 7-SSR genotyping system has been established as a  
724 useful tool for identification and parentage analysis, allowing the allele length of  
725 varieties to be comparably scored by different institutions [34,62].

726         In this study, 42 cases of misnaming were found by comparing the molecular  
727 profiles obtained with the information available in the literature and databases (S1  
728 Table). The molecular profile of the accession ‘Cabernet Franc’ corresponded to the  
729 cultivar Merlot Noir, and the molecular profile of the accession ‘Merlot Noir’  
730 corresponded to the cultivar Cabernet Franc, clearly indicating an exchange of  
731 nomenclature between these accessions. ‘Cabernet Franc’ is one of the parents of  
732 ‘Merlot Noir’, and some morphological traits of these two cultivars are quite similar  
733 [86], which certainly contributed to the occurrence of this mistake.

734         The molecular profile of the accession ‘Magoon’ matched that of ‘Regale’ in the  
735 present study, and ‘Regale’ had a similar molecular profile to those obtained by Schuck  
736 et al. (2011) [87] and Riaz et al. (2008) [88], indicating that ‘Magoon’ was misnamed at  
737 the time of introduction and that both accessions were the cultivar Regale. In Brazil, the  
738 same case of misnaming was also reported by Schuck et al. (2011) [87]. A misspelling

739 case was observed for the accession ‘Pedro Ximenez’, corresponding to ‘Pedro  
740 Gimenez’; both cultivars are classified by the VIVC as wine grapes with white berries.  
741 However, despite the similar names and some comparable characteristics, the  
742 genealogies of these cultivars are completely different, being easily distinguished by  
743 microsatellite marker analysis due to the different molecular profiles generated.

744 The accessions ‘Armenia I70060’ and ‘Armenia I70061’ were labeled according  
745 to their country of origin, Armenia, during their introduction. Through microsatellite  
746 marker analysis, these accessions were identified as ‘Aigezard’ and ‘Parvana’,  
747 respectively. A similar situation was observed for the accession ‘Moscatel Suíça’,  
748 corresponding to ‘Muscat Bleu’ from Switzerland; this accession was likely also labeled  
749 according to its country of origin.

750 Additionally, 31 synonymous groups were identified (S3 Table). Cases of  
751 synonymy could correspond to clones of the same cultivar that show phenotypic  
752 differences due to the occurrence of somatic mutations [89,90]. Mobile elements are  
753 known to generate somatic variation in vegetatively propagated plants such as  
754 grapevines [91,92]. Carrier et al. (2012) [91] observed that insertion polymorphism  
755 caused by mobile elements is the major cause of mutational events related to clonal  
756 variation. In grape, retrotransposon-induced insertion into *VvmybA1*, a homolog of  
757 *VlmybA1-1*, is the molecular basis of the loss of pigmentation in a white grape cultivar  
758 of *V. vinifera* due to the lack of anthocyanin production [93].

759 The detection of somatic mutations is very difficult with a small number of  
760 microsatellite markers, especially when they are located in noncoding regions of the  
761 genome [94]. This was the case for synonymous groups 19, 20, 21, 22, in S3 Table,  
762 such as the cultivar Italia and its mutations ‘Rubi’, ‘Benitaka’, and ‘Brasil’, which differ  
763 in terms of the color of berries, with white, pink, red, and black fruits, respectively, and



764 are cultivated as distinct cultivars in Brazil. This was also the case for 'Pinot Gris', a  
765 variant with gray berries arising from 'Pinot Noir', which has black berries. The  
766 mutations that occurred in the cultivar Niagara can be distinguished in terms of the  
767 color, size, and shape of the berries, and they may even lead to a lack of seeds, such as  
768 the apyrenic accession 'Niagara Seedless' or 'Rosinha' [95].

769 The accession 'Tinta Roriz' was identified as a synonym of the cultivar  
770 Tempranillo Tinto in this study; this synonym is already registered in the VIVC and is  
771 widely used in regions of Portugal [96]. The wild species *V. doaniana* and *V.*  
772 *berlandieri* have the same molecular profile, indicating a case of mislabeling; certainly,  
773 some mistake was made during the acquisition of these materials, and the same  
774 genotype was propagated with different names.

775 The occurrence of misidentification is common, especially for old clonal species  
776 such as *Vitis* spp., and it can occur during any stage of accession introduction and  
777 maintenance. It has been observed that 5 to 10% of the grape cultivars maintained in  
778 grape collections are incorrectly identified [97,98]. In a new place, a certain genotype  
779 may receive a new name, confusing samples and the maintenance of accessions in  
780 germplasm banks [99]. The correct identification of accessions is fundamental to  
781 optimize germplasm management and for the use of germplasm in ongoing breeding  
782 programs since related genotypes will not be chosen for field experiments or controlled  
783 crosses. The identification of the existence of synonyms, homonyms, and misnamed  
784 accessions is essential to prevent future propagation and breeding errors [87] and in  
785 helping to reduce germplasm maintenance costs without the risk of losing valuable  
786 genetic resources. Since morphological descriptors are highly influenced by  
787 environmental factors, molecular analyses can support identification. SSR markers have  
788 often been considered very efficient at the cultivar level since they can be easily used to

789 distinguish different cultivars; however, they are less effective in differentiating clones  
790 [9]. The results of molecular analysis should not replace ampelographic observations  
791 but should be integrated with such observations, mainly for the identification of somatic  
792 mutations.

793 In this study, 223 accessions with molecular profiles did not match any available  
794 reference profile. The largest subset of accessions was from the Brazilian grapevine  
795 breeding program of the IAC, with 109 molecular profiles described for the first time.  
796 The identification and description of unreported molecular profiles is important for  
797 regional and national viticulture and ensures the institution's intellectual property rights  
798 over these cultivars. The information obtained in this study will contribute to  
799 international cooperation to correctly identify grape germplasm and will allow the  
800 inclusion of new molecular profiles of Brazilian grapevine cultivars in the database.

801

## 802 **Development of a core collection**

803 The intention for the development of a core collection is to represent the genetic  
804 diversity of the entire germplasm in a reduced set of accessions that is feasible to  
805 handle. The efficiency of the approach based on SSR profiles in identifying a core  
806 collection was already demonstrated for grapevine by Le Cunff et al. (2008) [100],  
807 Cipriani et al. (2010) [101], Emanuelli et al. (2013) [70] and Migliaro et al. (2019) [29].

808 In this study, 120 accessions (Core 3) were necessary to capture all the allelic  
809 diversity of the whole collection, which is equivalent to approximately 30% of all  
810 accessions (Table 2). In *V. vinifera* subsp. *sativa* core collections, the same result was  
811 obtained with smaller percentages of individuals, from 4 to 15% [70,100,101].  
812 According to Le Cunff et al. (2008) [100], the use of only cultivated genotypes of *V.*  
813 *vinifera* subsp. *sativa* is one of the reasons for the small number of individuals in the

814 core collection since cultivated genotypes tend to be less diverse than wild counterparts  
815 [12,102].

816 Migliaro et al. (2019) [29] analyzed 379 grapevine rootstock accessions and  
817 managed to represent their full allelic richness with a core collection containing 30% of  
818 the accessions, a result similar to that observed in this study. According to these authors,  
819 the large number of individuals in the core collection can be related to the number of  
820 varieties belonging to different *Vitis* species and the high genetic variability detected.  
821 These are likely the same reasons for the need for a high number of genotypes in our  
822 core collection, since the *Vitis* spp. Germplasm Bank of the IAC also includes  
823 accessions belonging to different *Vitis* species and many interspecific hybrids that have  
824 complex pedigrees (derived from crosses among three or more species). The  
825 comparison of different methods used to form core collections is not easy, as the  
826 analyses are rarely performed in the same way, and the original collections rarely  
827 include the same global diversity of species [100].

828 Among the 120 genotypes in Core 3, 82 were identified as interspecific hybrids,  
829 with 13 being non-*vinifera* varieties. This large number of interspecific hybrids in the  
830 core collection can be explained by their predominance in germplasm; in addition, many  
831 of them have a complex pedigree, which certainly combines alleles of different species  
832 of *Vitis*. Regarding the other genotypes in Core 3, 31 were identified as *V. vinifera*  
833 cultivars and seven as wild *Vitis*.

834 The core collection was constructed to provide a logical subset of germplasm for  
835 examination when the entire collection cannot be used. Complementary criteria, such as  
836 phenotypic, agronomic, and adaptive traits, should be associated with the core  
837 collection to make it more fully representative. Finally, this core collection will be

838 useful for the development of new breeding strategies, future phenotyping efforts, and  
839 genome-wide association studies.

840

## 841 **Conclusions**

842 A wide range of genetic diversity was revealed in the studied germplasm,  
843 ensuring the conservation of a large portion of grapevine genetic resources. The genetic  
844 diversity showed a pattern of structuring based on the species and use of accessions, as  
845 evidenced in a manner similar to the three structuring analyses. In addition, each of the  
846 analyses provided different information that was be complementary and equally  
847 valuable for breeding.

848 Taken together, our results can be used to efficiently guide future breeding  
849 efforts, whether through traditional hybridization or new breeding technologies. The  
850 obtained information may also enhance the management of grapevine germplasms and  
851 provide molecular data from a large set of genetic resources that contribute to  
852 expanding existing database information.

853

## 854 **Acknowledgments**

855 The authors are grateful to the São Paulo Research Foundation (FAPESP) and  
856 Coordination for the Improvement of Higher Education Personnel (CAPES) for  
857 supporting the project and researchers.

858

## 859 **References**

860 1. Torregrosa L, Vialet S, Adivèze A, Iocco-Corena P, Thomas MR. Grapevine  
861 (Vitis vinifera L.). In: Wang K, editor. Agrobacterium Protocols Methods in

- 862 Molecular Biology. New York, NY: Springer; 2015. pp. 177–194.  
863 doi:10.1007/978-1-4939-1658-0\_15
- 864 2. This P, Lacombe T, Thomas MR. Historical origins and genetic diversity of wine  
865 grapes. *Trends Genet.* 2006;22: 511–519. doi:10.1016/j.tig.2006.07.008
- 866 3. Camargo UA, Tonietto J, Hoffmann A. Progressos na Viticultura Brasileira. *Rev*  
867 *Bras Frutic.* 2011;33: 144–149. doi:10.1590/S0100-29452011005000028
- 868 4. Tecchio MA, Hernandez JL, Pires EJP, Terra MM, Moura MF. Cultivo da videira  
869 para mesa, vinho e suco. 2nd ed. In: Pio R, editor. *Cultivo de fruteiras de clima*  
870 *temperado em regiões subtropicais e tropicais.* 2nd ed. Lavras, BR: UFLA; 2018.  
871 pp. 512–585.
- 872 5. Khadivi A, Gismondi A, Canini A. Genetic characterization of Iranian grapes  
873 (*Vitis vinifera* L.) and their relationships with Italian ecotypes. *Agrofor Syst.*  
874 2019;93: 435–447. doi:10.1007/s10457-017-0134-1
- 875 6. Alves J da Si, Ledo CA da S, Silva S de O e, Pereira VM, Silveira D de C.  
876 *Divergência genética entre genótipos de bananeira no estado do Rio de Janeiro.*  
877 *Magistra.* 2012;24: 116–122.
- 878 7. Nass LL, Sigrist MS, Ribeiro CS da C, Reifschneider FJB. Genetic resources: the  
879 basis for sustainable and competitive plant breeding. *Crop Breed Appl*  
880 *Biotechnol.* 2012;12: 75–86. doi:10.1590/s1984-70332012000500009
- 881 8. Manechini JRV, Costa JB da, Pereira BT, Carlini-Garcia LA, Xavier MA,  
882 Landell MG de A, et al. Unraveling the genetic structure of Brazilian commercial  
883 sugarcane cultivars through microsatellite markers. *PLoS One.* 2018;13.  
884 doi:10.1371/journal.pone.0195623
- 885 9. Laucou V, Lacombe T, Dechesne F, Siret R, Bruno JP, Dessup M, et al. High  
886 throughput analysis of grape genetic diversity as a tool for germplasm collection

- 887 management. *Theor Appl Genet.* 2011;122: 1233–1245. doi:10.1007/s00122-  
888 010-1527-y
- 889 10. Leão PCS, Riaz S, Graziani R, Dangl GS, Motoike SY, Walker MA.  
890 Characterization of a Brazilian grape germplasm collection using microsatellite  
891 markers. *Am J Enol Vitic.* 2009;60: 517–524.
- 892 11. Doulati-Baneh H, Mohammadi SA, Labra M. Genetic structure and diversity  
893 analysis in *Vitis vinifera* L. cultivars from Iran using SSR markers. *Sci Hortic*  
894 (Amsterdam). 2013;160: 29–36. doi:10.1016/j.scienta.2013.05.029
- 895 12. De Souza LM, Guen V Le, Cerqueira-Silva CBM, Silva CC, Mantello CC,  
896 Conson ARO, et al. Genetic diversity strategy for the management and use of  
897 rubber genetic resources: More than 1,000 wild and cultivated accessions in a  
898 100-genotype core collection. *PLoS One.* 2015;10: 1–20.  
899 doi:10.1371/journal.pone.0134607
- 900 13. Mohammadi SA, Prasanna BM. Analysis of genetic diversity in crop plants -  
901 Salient statistical tools and considerations. *Crop Sci.* 2003;43: 1235–1248.  
902 doi:10.2135/cropsci2003.1235
- 903 14. Boursiquot JM, This P. Les nouvelles techniques utilisées en ampélographie:  
904 informatique et marquage. *J Int des Sci la Vigne du Vin.* 1996;Special: 13–23.
- 905 15. Roychowdhury R, Taoutaou A, Hakeem KR, Ragab M, Gawwad A, Tah J.  
906 Molecular Marker-Assisted Technologies for Crop Improvement. 2014; 241–258.  
907 doi:10.13140/RG.2.1.2822.2560
- 908 16. Jarne P, Lagoda PJJL. Microsatellites, from molecules to populations and back.  
909 *Trends Ecol Evol.* 1996;11: 424–429. doi:10.1016/0169-5347(96)10049-5
- 910 17. Lamboy WF, Alpha CG. Using simple sequence repeats (SSRs) for DNA  
911 fingerprinting germplasm accessions of grape (*Vitis* L.) species. *Journal of the*

- 912 American Society for Horticultural Science. 1998. pp. 182–188.  
913 doi:10.21273/jashs.123.2.182
- 914 18. Cipriani G, Frazza G, Peterlunger E, Testolin R. Grapevine fingerprinting using  
915 microsatellite repeats. *Vitis*. 1994;33: 211–215.
- 916 19. Buhner-Zaharieva T, Moussaoui S, Lorente M, Andreu J, Núñez R, Ortiz JM, et  
917 al. Preservation and molecular characterization of ancient varieties in spanish  
918 grapevine germplasm collections. *Am J Enol Vitic*. 2010;61: 557–562.  
919 doi:10.5344/ajev.2010.09129
- 920 20. Martín JP, Borrego J, Cabello F, Ortiz JM. Characterization of Spanish grapevine  
921 cultivar diversity using sequence-tagged microsatellite site markers. *Genome*.  
922 2003;46: 10–18. doi:10.1139/g02-098
- 923 21. De Lorenzis G, Imazio S, Biagini B, Failla O, Scienza A. Pedigree reconstruction  
924 of the Italian grapevine aglianico (*Vitis vinifera* L.) from Campania. *Mol*  
925 *Biotechnol*. 2013;54: 634–642. doi:10.1007/s12033-012-9605-9
- 926 22. De Lorenzis G, Casas G Las, Brancadoro L, Scienza A. Genotyping of Sicilian  
927 grapevine germplasm resources (*V. vinifera* L.) and their relationships with  
928 Sangiovese. *Sci Hortic (Amsterdam)*. 2014;169: 189–198.  
929 doi:10.1016/j.scienta.2014.02.028
- 930 23. Guo Y, Lin H, Liu Z, Zhao Y, Guo X, Li K. SSR and SRAP marker-based  
931 linkage map of *Vitis vinifera* L. *Biotechnol Biotechnol Equip*. 2014;28: 221–229.  
932 doi:10.1080/13102818.2014.907996
- 933 24. Grando MS, Bellin D, Edwards KJ, Pozzi C, Stefanini M, Velasco R. Molecular  
934 linkage maps of *Vitis vinifera* L. and *Vitis riparia* Mchx. *Theor Appl Genet*.  
935 2003;106: 1213–1224. doi:10.1007/s00122-002-1170-3
- 936 25. Doligez A, Bouquet A, Danglot Y, Lahogue F, Riaz S, Meredith CP, et al.

- 937 Genetic mapping of grapevine (*Vitis vinifera* L.) applied to the detection of QTLs  
938 for seedlessness and berry weight. *Theor Appl Genet.* 2002;105: 780–795.  
939 doi:10.1007/s00122-002-0951-z
- 940 26. Saifert L, Sánchez-Mora FD, Assumpção WT, Zanghelini JA, Giacometti R,  
941 Novak EI, et al. Marker-assisted pyramiding of resistance loci to grape downy  
942 mildew. *Pesqui Agropecu Bras.* 2018;53: 602–610. doi:10.1590/S0100-  
943 204X2018000500009
- 944 27. Lefort F, Roubelakis-Angelakis KA. The greek vitis database: A multimedia  
945 web-backed genetic database for Germplasm management of vitis resources in  
946 Greece. *J Wine Res.* 2000;11: 233–242. doi:10.1080/713684241
- 947 28. Doyle J. DNA Protocols for Plants. *Mol Tech Taxon.* 1991; 283–293.  
948 doi:10.1007/978-3-642-83962-7\_18
- 949 29. Migliaro D, De Lorenzis G, Di Lorenzo GS, Nardi B De, Gardiman M, Failla O,  
950 et al. Grapevine non-vinifera genetic diversity assessed by simple sequence  
951 repeat markers as a starting point for new rootstock breeding programs. *Am J*  
952 *Enol Vitic.* 2019;70: 390–397. doi:10.5344/ajev.2019.18054
- 953 30. Zarouri B, Vargas AM, Gaforio L, Aller M, de Andrés MT, Cabezas JA. Whole-  
954 genome genotyping of grape using a panel of microsatellite multiplex PCRs. *Tree*  
955 *Genet Genomes.* 2015;11. doi:10.1007/s11295-015-0843-4
- 956 31. Popescu CF, Maul E, Dejeu LC, Dinu D, Gheorge RN, Laucou V, et al.  
957 Identification and characterization of Romanian grapevine genetic resources.  
958 *Vitis - J Grapevine Res.* 2017;56: 173–180. doi:10.5073/vitis.2017.56.173-180
- 959 32. Merdinoglu D, Butterlin G, Bevilacqua L, Chiquet V, Adam-Blondon AF,  
960 Decroocq S. Development and characterization of a large set of microsatellite  
961 markers in grapevine (*Vitis vinifera* L.) suitable for multiplex PCR. *Mol Breed.*



- 962 2005;15: 349–366. doi:10.1007/s11032-004-7651-0
- 963 33. This P, Dettweiler E. EU-project genres CT96 No81: European vitis database and  
964 results regarding the use of a common set of microsatellite markers. *Acta Hort.*  
965 2003;603: 59–66. doi:10.17660/ActaHortic.2003.603.3
- 966 34. International Organisation of Vine and Wine (OIV). 2nd edition of the OIV  
967 Descriptor list for grape varieties and *Vitis* species. Paris: O.I.V.; 2001.
- 968 35. Thomas MR, Scott NS. Microsatellite repeats in grapevine reveal DNA  
969 polymorphisms when analysed as sequence-tagged sites (STSs). *Theor Appl*  
970 *Genet.* 1993;86: 985–990. doi:10.1007/BF00211051
- 971 36. Bowers JE, Dangl GS, Vignani R, Meredith CP. Isolation and characterization of  
972 new polymorphic simple sequence repeat loci in grape (*Vitis vinifera* L.).  
973 *Genome.* 1996;39: 628–633. doi:10.1139/g96-080
- 974 37. Bowers JE, Dangl GS, Meredith CP. Development and characterization of  
975 additional microsatellite DNA markers for grape. *Am J Enol Vitic.* 1999;50:  
976 243–246.
- 977 38. Sefc KM, Regner F, Turetschek E, Glössl J, Steinkellner H. Identification of  
978 microsatellite sequences in *Vitis riparia* and their applicability for genotyping of  
979 different *Vitis* species. *Genome.* 1999;42: 367–373. doi:10.1139/g98-168
- 980 39. Schuelke M. An economic method for the fluorescent labeling of PCR fragments.  
981 *Nat Biotechnol.* 2000;18: 233–234. doi:10.1038/72708
- 982 40. Kearse M, Moir R, Wilson A, Stones-Havas S, Cheung M, Sturrock S, et al.  
983 Geneious Basic: An integrated and extendable desktop software platform for the  
984 organization and analysis of sequence data. *Bioinformatics.* 2012;28: 1647–1649.  
985 doi:10.1093/bioinformatics/bts199
- 986 41. Peakall R, Smouse PE. GenALEx 6.5: Genetic analysis in Excel. *Population*

- 987 genetic software for teaching and research-an update. *Bioinformatics*. 2012;28:  
988 2537–2539. doi:10.1093/bioinformatics/bts460
- 989 42. Kalinowski ST, Taper ML, Marshall TC. Revising how the computer program  
990 CERVUS accommodates genotyping error increases success in paternity  
991 assignment. *Mol Ecol*. 2007;16: 1099–1106. doi:10.1111/j.1365-  
992 294X.2007.03089.x
- 993 43. Botstein D, White RL, Skolnick M, Davis RW. Construction of a Genetic  
994 Linkage Map in Man Using Restriction Fragment Length Polymorphisms. *Am J*  
995 *Hum Genet*. 1980;32: 314–331.
- 996 44. Tessier C, David J, This P, Boursiquot JM, Charrier A. Optimization of the  
997 choice of molecular markers for varietal identification in *Vitis vinifera* L. *Theor*  
998 *Appl Genet*. 1999;98: 171–177. doi:10.1007/s001220051054
- 999 45. Dakin EE, Avise JC. Microsatellite null alleles in parentage analysis. *Heredity*  
1000 (Edinb). 2004;93: 504–509. doi:10.1038/sj.hdy.6800545
- 1001 46. Summers K, Amos W. Behavioral, ecological, and molecular genetic analyses of  
1002 reproductive strategies in the Amazonian dart-poison frog, *Dendrobates*  
1003 *ventrimaculatus*. *Behav Ecol*. 1997;8: 260–267. doi:10.1093/beheco/8.3.260
- 1004 47. Pritchard JK, Stephens M, Donnelly P. Inference of population structure using  
1005 multilocus genotype data. *Genetics*. 2000;155: 945–59.
- 1006 48. Porras-Hurtado L, Ruiz Y, Santos C, Phillips C, Carracedo Á, Lareu M V. An  
1007 overview of STRUCTURE: Applications, parameter settings, and supporting  
1008 software. *Front Genet*. 2013;4: 1–13. doi:10.3389/fgene.2013.00098
- 1009 49. Vähä JP, Erkinaro J, Niemelä E, Primmer CR. Life-history and habitat features  
1010 influence the within-river genetic structure of Atlantic salmon. *Mol Ecol*.  
1011 2007;16: 2638–2654. doi:10.1111/j.1365-294X.2007.03329.x

- 1012 50. Pritchard JK, Wen X, Falush D. Documentation for structure software: Version  
1013 2.2. Chicago, USA: University of Chicago; 2007.
- 1014 51. Earl DA, vonHoldt BM. STRUCTURE HARVESTER: A website and program  
1015 for visualizing STRUCTURE output and implementing the Evanno method.  
1016 *Conserv Genet Resour.* 2012;4: 359–361. doi:10.1007/s12686-011-9548-7
- 1017 52. Evanno G, Regnaut S, Goudet J. Detecting the number of clusters of individuals  
1018 using the software STRUCTURE: A simulation study. *Mol Ecol.* 2005;14: 2611–  
1019 2620. doi:10.1111/j.1365-294X.2005.02553.x
- 1020 53. Jakobsson M, Rosenberg NA. CLUMPP: A cluster matching and permutation  
1021 program for dealing with label switching and multimodality in analysis of  
1022 population structure. *Bioinformatics.* 2007;23: 1801–1806.  
1023 doi:10.1093/bioinformatics/btm233
- 1024 54. Rosenberg NA. DISTRUCT: A program for the graphical display of population  
1025 structure. *Mol Ecol Notes.* 2004;4: 137–138. doi:10.1046/j.1471-  
1026 8286.2003.00566.x
- 1027 55. Rogers JS. Measures of genetic similarity and genetic distance. VII. *Studies in*  
1028 *Genetics.* VII. Austin, TX: University of Texas Publication 7213; 1972. pp. 145–  
1029 153.
- 1030 56. Saitou N, Nei M. The neighbor-joining method: a new method for reconstructing  
1031 phylogenetic trees. *Mol Biol Evol.* 1987;4: 406–425.  
1032 doi:doi.org/10.1093/oxfordjournals.molbev.a04045493683
- 1033 57. Kamvar ZN, Tabima JF, Grünwald NJ. Poppr: An R package for genetic  
1034 analysis of populations with clonal, partially clonal, and/or sexual reproduction.  
1035 *PeerJ.* 2014;2014: 1–14. doi:10.7717/peerj.281
- 1036 58. Letunic I, Bork P. Interactive Tree Of Life (iTOL) v4: recent updates and new

- 1037 developments. *Nucleic Acids Res.* 2019;47: W256–W259.
- 1038 doi:10.1093/nar/gkz239
- 1039 59. Jombart T. Adegnet: A R package for the multivariate analysis of genetic
- 1040 markers. *Bioinformatics.* 2008;24: 1403–1405.
- 1041 doi:10.1093/bioinformatics/btn129
- 1042 60. Jombart T, Ahmed I. adegenet 1.3-1: New tools for the analysis of genome-wide
- 1043 SNP data. *Bioinformatics.* 2011;27: 3070–3071.
- 1044 doi:10.1093/bioinformatics/btr521
- 1045 61. Jombart T, Devillard S, Balloux F. Discriminant analysis of principal
- 1046 components: A new method for the analysis of genetically structured populations.
- 1047 *BMC Genet.* 2010;11. doi:10.1186/1471-2156-11-94
- 1048 62. This P, Jung A, Boccacci P, Borrego J, Botta R, Costantini L, et al. Development
- 1049 of a standard set of microsatellite reference alleles for identification of grape
- 1050 cultivars. *Theor Appl Genet.* 2004;109: 1448–1458. doi:10.1007/s00122-004-
- 1051 1760-3
- 1052 63. De Beukelaer H, Davenport GF, Fack V. Core Hunter 3: flexible core subset
- 1053 selection. *BMC Bioinformatics.* 2018;19: 203. doi:10.1186/s12859-018-2209-z
- 1054 64. Schuck MR, Moreira FM, Guerra MP, Voltolini JA, Grando MS, Silva AL da.
- 1055 Molecular characterization of grapevine from Santa Catarina, Brazil, using
- 1056 microsatellite markers. *Pesqui Agropecuária Bras.* 2009;44: 487–495.
- 1057 doi:10.1590/s0100-204x2009000500008
- 1058 65. Leão PC de S, Cruz CD, Motoike SY. Diversity and genetic relatedness among
- 1059 genotypes of *Vitis* spp. using microsatellite molecular markers. *Rev Bras Frutic.*
- 1060 2013;35: 799–808. doi:10.1590/s0100-29452013000300017
- 1061 66. Boz Y, Bakir M, Çelikkol BP, Kazan K, Yilmaz F, Çakir B, et al. Genetic

- 1062 characterization of grape (*Vitis vinifera* L.) germplasm from Southeast Anatolia  
1063 by SSR markers. *Vitis - J Grapevine Res.* 2011;50: 99–106.
- 1064 67. Ibáñez J, De Andrés MT, Molino A, Borrego J. Genetic study of key Spanish  
1065 grapevine varieties using microsatellite analysis. *Am J Enol Vitic.* 2003;54: 22–  
1066 30.
- 1067 68. Pollefeys P, Bousquet J. Molecular genetic diversity of the French – American  
1068 grapevine hybrids cultivated in North America. *Genome.* 2003;46: 1037–1048.  
1069 doi:10.1139/g03-076
- 1070 69. Laucou V, Launay A, Bacilieri R, Lacombe T, Andre MT De, Hausmann L, et al.  
1071 Extended diversity analysis of cultivated grapevine *Vitis vinifera* with 10K  
1072 genome-wide SNPs. *PLoS One.* 2018;13: 1–27.  
1073 doi:<https://doi.org/10.1371/journal.pone.0192540>
- 1074 70. Emanuelli F, Lorenzi S, Grzeskowiak L, Catalano V, Stefanini M, Troggio M, et  
1075 al. Genetic diversity and population structure assessed by SSR and SNP markers  
1076 in a large germplasm collection of grape. *BMC Plant Biol.* 2013;13: 1–17.  
1077 doi:10.1186/1471-2229-13-39
- 1078 71. Hajjar R, Hodgkin T. The use of wild relatives in crop improvement□: A survey  
1079 of developments over the last 20 years The use of wild relatives in crop  
1080 improvement□: A survey of developments over the last 20 years. *Euphytica.*  
1081 2007;156: 1–13. doi:10.1007/s10681-007-9363-0
- 1082 72. Aradhya MK, Dangl GS, Prins BH, Boursiquot JM, Walker MA, Meredith CP, et  
1083 al. Genetic structure and differentiation in cultivated grape, *Vitis vinifera* L.  
1084 *Genet Res.* 2003;81: 179–192. doi:10.1017/S0016672303006177
- 1085 73. Costa AF, Teodoro PE, Bhering LL, Tardin FD, Daher RF. Molecular analysis of  
1086 genetic diversity among vine accessions using DNA markers. *Genet Mol Res.*

- 1087 2017;16: 1–9. doi:10.4238/gmr16029586
- 1088 74. Miller AJ, Matasci N, Schwaninger H, Aradhya MK, Prins B, Zhong G-Y, et al.  
1089 Vitis Phylogenomics: Hybridization Intensities from a SNP Array Outperform  
1090 Genotype Calls. Wang T, editor. PLoS One. 2013;8: 1–11.  
1091 doi:10.1371/journal.pone.0078680
- 1092 75. Kellow A V., McDonald G, Corrie AM, Heeswijck R. In vitro assessment of  
1093 grapevine resistance to two populations of phylloxera from Australian vineyards.  
1094 Aust J Grape Wine Res. 2002;8: 109–116. doi:10.1111/j.1755-  
1095 0238.2002.tb00219.x
- 1096 76. Pommer C V. Uva: Tecnologia de produção, pós-colheita, mercado. Porto  
1097 Alegre: Cinco Continentes; 2003.
- 1098 77. Sefc KM, Lopes MS, Lefort F, Botta R, Roubelakis-Angelakis KA, Ibáñez J, et  
1099 al. Microsatellite variability in grapevine cultivars from different European  
1100 regions and evaluation of assignment testing to assess the geographic origin of  
1101 cultivars. Theor Appl Genet. 2000;100: 498–505. doi:10.1007/s001220050065
- 1102 78. Crespan M, Fabbro A, Giannetto S, Meneghetti S, Petrusci C, Del Zan F, et al.  
1103 Recognition and genotyping of minor germplasm of Friuli Venezia Giulia  
1104 revealed high diversity. Vitis - J Grapevine Res. 2011;50: 21–28.
- 1105 79. Marsal G, Mateo-Sanz JM, Canals JM, Zamora F, Fort F. SSR analysis of 338  
1106 accessions planted in Penedès (Spain) reveals 28 unreported molecular profiles of  
1107 Vitis vinifera L. Am J Enol Vitic. 2016;67: 466–470.  
1108 doi:10.5344/ajev.2016.16013
- 1109 80. Schneider A, Raimondi S, Pirolo CS, Marinoni DT, Ruffa P, Venerito P, et al.  
1110 Genetic characterization of grape cultivars from Apulia (southern Italy) and  
1111 synonymies in other Mediterranean regions. Am J Enol Vitic. 2014;65: 244–249.

- 1112 doi:10.5344/ajev.2013.13082
- 1113 81. Pommer C V. Uva. In: Furlani AMC, editor. O melhoramento de plantas no  
1114 Instituto Agronômico. Campinas: Instituto Agronômico; 1993. pp. 489–524.
- 1115 82. Ferri CP, Pommer CV. Quarenta e oito anos de melhoramento da videira em São  
1116 Paulo, Brasil. *Sci Agric*. 1995;52: 107–122. doi:10.1590/s0103-  
1117 90161995000100019
- 1118 83. Eibach R, Töpfer R. Traditional grapevine breeding techniques. *Grapevine*  
1119 *Breeding Programs for the Wine Industry*. Elsevier Ltd; 2015. doi:10.1016/B978-  
1120 1-78242-075-0.00001-6
- 1121 84. Arriel NHC, Di Mauro AO, Di Mauro SMZ, Bakke OA, Unêda-Trevisoli SH,  
1122 Costa MM, et al. Técnicas multivariadas na determinação da diversidade genética  
1123 em gergelim usando marcadores RAPD. *Pesqui Agropecuária Bras*. 2006;41:  
1124 801–809. doi:10.1590/s0100-204x2006000500012
- 1125 85. Leão PC de S, Motoike SY. Genetic diversity in table grapes based on RAPD and  
1126 microsatellite markers. *Pesqui Agropecu Bras*. 2011;46: 1035–1044.  
1127 doi:10.1590/S0100-204X2011000900010
- 1128 86. Boursiquot JM, Lacombe T, Laucou V, Julliard S, Perrin FX, Lanier N, et al.  
1129 Parentage of merlot and related winegrape cultivars of southwestern france:  
1130 Discovery of the missing link. *Aust J Grape Wine Res*. 2009;15: 144–155.  
1131 doi:10.1111/j.1755-0238.2008.00041.x
- 1132 87. Schuck MR, Biasi LA, Mariano AM, Lipski B, Riaz S, Walker MA. Obtaining  
1133 interspecific hybrids, and molecular analysis by microsatellite markers in  
1134 grapevine. *Pesqui Agropecu Bras*. 2011;46: 1480–1488. doi:10.1590/S0100-  
1135 204X2011001100009
- 1136 88. Riaz S, Tenscher AC, Smith BP, Ng DA, Walker MA. Use of SSR markers to

- 1137 assess identity, pedigree, and diversity of cultivated muscadine grapes. *J Am Soc*  
1138 *Hortic Sci.* 2008;133: 559–568. doi:10.21273/jashs.133.4.559
- 1139 89. Walker AR, Lee E, Robinson SP. Two new grape cultivars, bud sports of  
1140 Cabernet Sauvignon bearing pale-coloured berries, are the result of deletion of  
1141 two regulatory genes of the berry colour locus. *Plant Mol Biol.* 2006;62: 623–  
1142 635. doi:10.1007/s11103-006-9043-9
- 1143 90. Vignani R, Bowers JE, Meredith CP. Microsatellite DNA polymorphism analysis  
1144 of clones of *Vitis vinifera* “Sangiovese.” *Sci Hortic (Amsterdam).* 1996;65: 163–  
1145 169. doi:10.1016/0304-4238(95)00865-9
- 1146 91. Carrier G, Le Cunff L, Dereeper A, Legrand D, Sabot F, Bouchez O, et al.  
1147 Transposable elements are a major cause of somatic polymorphism in *vitis*  
1148 *vinifera* L. *PLoS One.* 2012;7: 1–10. doi:10.1371/journal.pone.0032973
- 1149 92. Fernandez L, Torregrosa L, Segura V, Bouquet A, Martinez-Zapater JM.  
1150 Transposon-induced gene activation as a mechanism generating cluster shape  
1151 somatic variation in grapevine. *Plant J.* 2010;61: 545–557. doi:10.1111/j.1365-  
1152 313X.2009.04090.x
- 1153 93. Kobayashi S, Goto-Yamamoto N, Hirochika H. Retrotransposon-Induced  
1154 Mutations in Grape Skin Color. *Science (80- ).* 2004;304: 982.  
1155 doi:10.1126/science.1095011
- 1156 94. Zulini L, Fabro E, Peterlunger E. Characterisation of the grapevine cultivar  
1157 Picolit by means of morphological descriptors and molecular markers. *Vitis - J*  
1158 *Grapevine Res.* 2005;44: 35–38.
- 1159 95. Souza JSI, Martins FP. *Viticultura Brasileira: principais variedades e suas*  
1160 *características.* Piracicaba: FEALQ; 2002.
- 1161 96. Ibáñez J, Muñoz-Organero G, Hasna Zinelabidine L, Teresa de Andrés M,



- 1162 Cabello F, Martínez-Zapater JM. Genetic origin of the grapevine cultivar  
1163 tempranillo. *Am J Enol Vitic.* 2012;63: 549–553. doi:10.5344/ajev.2012.12012
- 1164 97. De Andrés MT, Cabezas JA, Cervera MT, Borrego J, Martínez-Zapater JM,  
1165 Jouve N. Molecular characterization of grapevine rootstocks maintained in  
1166 germplasm collections. *Am J Enol Vitic.* 2007;58: 75–86.
- 1167 98. Dettweiler E. The grapevine herbarium as an aid to grapevine identification- First  
1168 results. *Vitis.* 1992;31: 117–120.
- 1169 99. Moura EF, Farias Neto JT de, Sampaio JE, Silva DT da, Ramalho GF.  
1170 Identification of duplicates of cassava accessions sampled on the North Region of  
1171 Brazil using microsatellite markers. *Acta Amaz.* 2013;43: 461–467.  
1172 doi:10.1590/s0044-59672013000400008
- 1173 100. Le Cunff L, Fournier-Level A, Laucou V, Vezzulli S, Lacombe T, Adam-  
1174 Blondon AF, et al. Construction of nested genetic core collections to optimize the  
1175 exploitation of natural diversity in *Vitis vinifera* L. subsp. *sativa*. *BMC Plant*  
1176 *Biol.* 2008;8. doi:10.1186/1471-2229-8-31
- 1177 101. Cipriani G, Spadotto A, Jurman I, Gaspero G Di, Crespan M, Meneghetti S, et al.  
1178 The SSR-based molecular profile of 1005 grapevine (*Vitis vinifera* L.) accessions  
1179 uncovers new synonymy and parentages, and reveals a large admixture amongst  
1180 varieties of different geographic origin. *Theor Appl Genet.* 2010;121: 1569–  
1181 1585. doi:10.1007/s00122-010-1411-9
- 1182 102. Bartsch D, Lehnen M, Clegg J, Pohl-Orf M, Schuphan I, Ellstrand NC. Impact of  
1183 gene flow from cultivated beet on genetic diversity of wild sea beet populations.  
1184 *Mol Ecol.* 1999;8: 1733–1741. doi:10.1046/j.1365-294x.1999.00769.x
- 1185 103. Adam-Blondon AF, Roux C, Claux D, Butterlin G, Merdinoglu D, This P.  
1186 Mapping 245 SSR markers on the *Vitis vinifera* genome: A tool for grape

1187 genetics. Theor Appl Genet. 2004;109: 1017–1027. doi:10.1007/s00122-004-  
1188 1704-y

1189

## 1190 **Supporting Information**

1191 **S1 Table. Genotypes used in this study.** Detailed characteristics: SSR matches, usage,  
1192 country of origin, species, group assignments according to the DAPC, and  
1193 STRUCTURE first and second round, core collection composition, and genotyping  
1194 results obtained with the 17 microsatellite markers.

1195

1196 **S2 Table. Name, linkage group, microsatellite sequences, and references of the SSR**  
1197 **markers used in this study.**

1198

1199 **S3 Table. List of synonyms found in the *Vitis* spp. Germplasm Bank of the**  
1200 **Agronomic Institute of Campinas (IAC) by SSR analysis.**

1201

1202 **S1 Fig. Bayesian information criterion (BIC) values for different numbers of**  
1203 **clusters.** The accepted true number of clusters was nine.

1204

1205 **S2 Fig. Harvester results for STRUCTURE second round.** Graphics for the detection  
1206 of the most probable number of groups (K) estimated based on the method described by  
1207 Evanno et al. (2005) [51]. [A] Cluster 1 - Highest peak for  $K=2$ . [B] Cluster 2 -  
1208 Highest peak for  $K=4$ . [C] Cluster 3 - Highest peak for  $K=2$ . [D] Admixture  
1209 group - Highest peak for  $K=2$ .

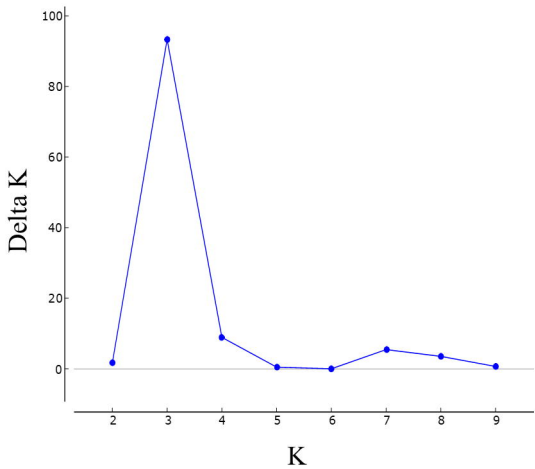

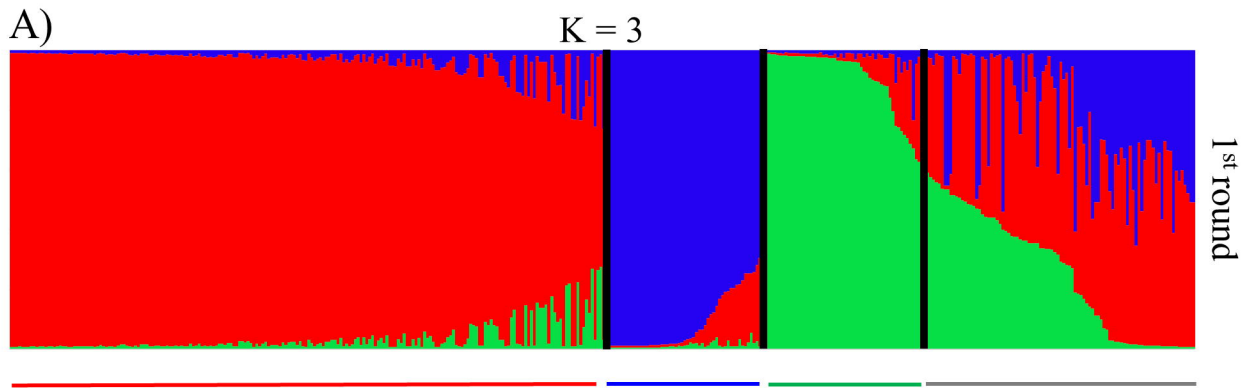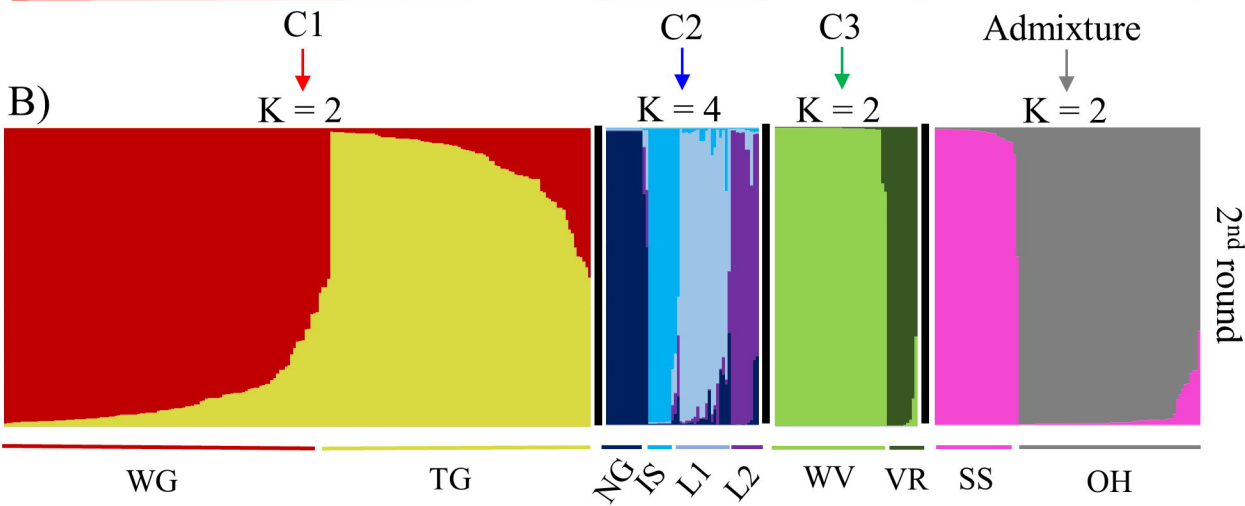

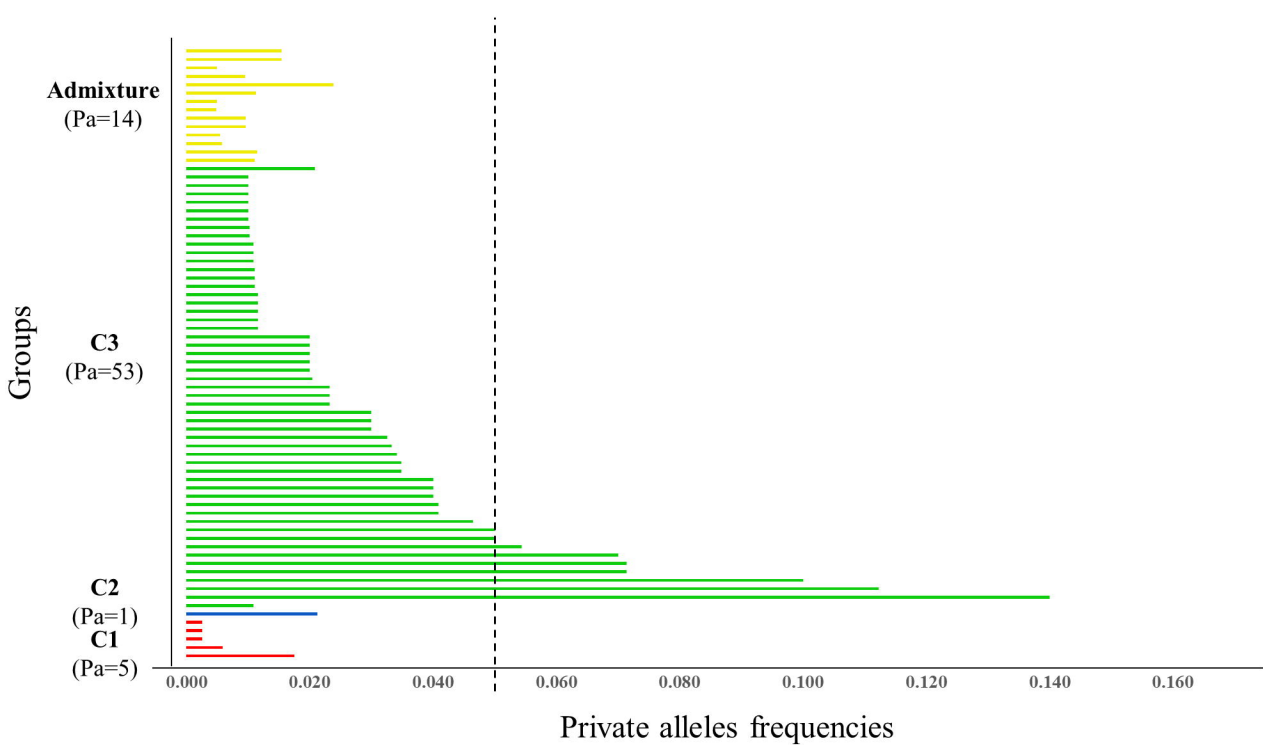

A)

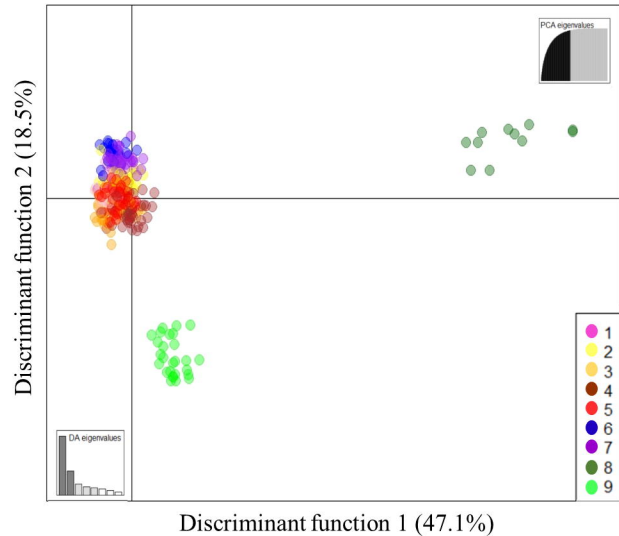

B)

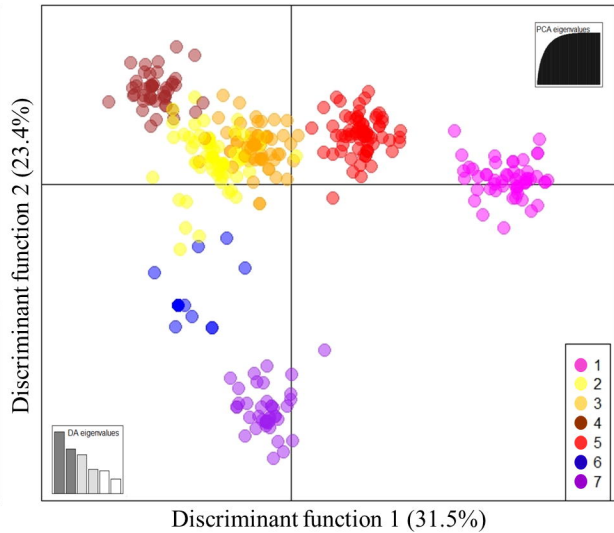

bootstrap

●  $\geq 90$

- *V. rotundifolia*
- Wild *Vitis*
- *V. vinifera*
- *V. labrusca* hybrids
- IAC hybrids
- Seibel series
- Other hybrids

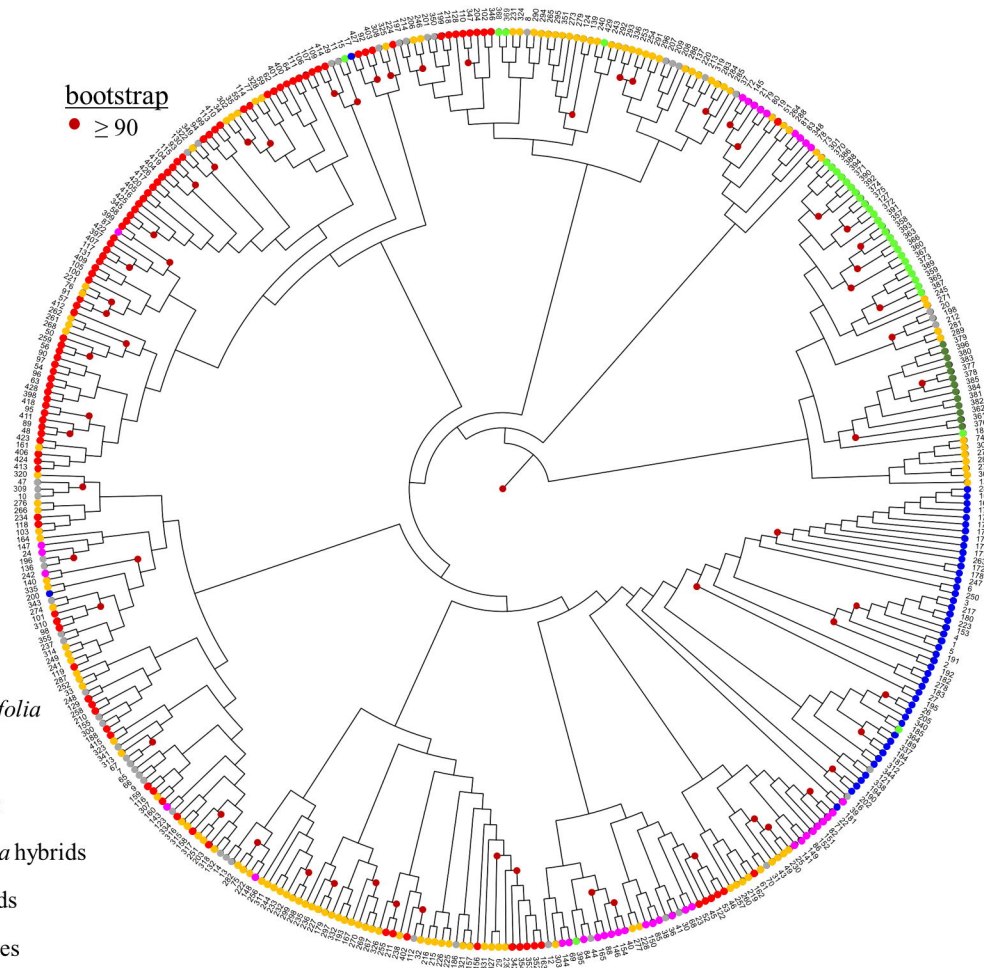

Source: https://www.biorxiv.org/content/10.1101/2020.05.05.078865v5.full.pdf
